# Supplementary material for: Nostochopcerol, a new antibacterial monoacylglycerol from the edible cyanobacterium Nostochopsis lobatus
Source: publisher site journal article supplement (doi:10.3762/bjoc.19.13), 2023-02-09
Supplement: Additional file 1 [file 1860-5397-19-13-S1.pdf]

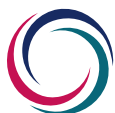

## Supporting Information

for

### **Nostochopterol, a new antibacterial monoacylglycerol from the edible cyanobacterium *Nostochopsis lobatus***

Naoya Oku, Saki Hayashi, Yuji Yamaguchi, Hiroyuki Takenaka and Yasuhiro Igarashi

*Beilstein J. Org. Chem.* **2023**, *19*, 133–138. [doi:10.3762/bjoc.19.13](https://doi.org/10.3762/bjoc.19.13)

### **Experimental details, characterization data and copies of spectra**

## Table of contents

### Experimental procedure.....S2

Preparation of linoleic acid from methyl linoleate

Chiral  $\alpha$ -linoleyl- $\alpha'$ , $\beta$ -*O*-isopropylidene glycerols **2a** and **2b**

Chiral  $\alpha$ -linoleoylglycerols **3a** and **3b**

$^1\text{H}$  (500 MHz) and  $^{13}\text{C}$  (125 MHz) NMR data for compounds **2b** and **3a** in  $\text{CDCl}_3$

### MS and NMR spectra

#### nostochopcerol (**1**)

Positive ion HRESITOFMS spectrum .....S5

$^1\text{H}$  NMR spectrum ( $\text{CD}_3\text{OH}$ , 500 MHz) .....S6

$^{13}\text{C}$  NMR spectrum ( $\text{CH}_3\text{OH}$ , 125 MHz) .....S7

COSY spectrum ( $\text{CH}_3\text{OH}$ , 500 MHz) .....S8

HSQC spectrum ( $\text{CH}_3\text{OH}$ , 500 MHz) .....S9

HMBC spectrum ( $\text{CH}_3\text{OH}$ , 500 MHz) .....S10

#### 3-linoleoyl-1,2-*O*-isopropylidene-*sn*-glycerol (**2b**)

$^1\text{H}$  NMR spectrum ( $\text{CDCl}_3$ , 500 MHz) .....S11

$^{13}\text{C}$  NMR spectrum ( $\text{CDCl}_3$ , 125 MHz) .....S12

COSY45 spectrum ( $\text{CDCl}_3$ , 500 MHz) .....S13

HSQC spectrum ( $\text{CDCl}_3$ , 500 MHz) .....S14

HMBC spectrum ( $\text{CDCl}_3$ , 500 MHz) .....S15

#### 1-linoleoyl-*sn*-glycerol (**3a**)

$^1\text{H}$  NMR spectrum ( $\text{CDCl}_3$ , 500 MHz) .....S16

$^{13}\text{C}$  NMR spectrum ( $\text{CDCl}_3$ , 125 MHz) .....S17

COSY45 spectrum ( $\text{CDCl}_3$ , 500 MHz) .....S18

HSQC spectrum ( $\text{CDCl}_3$ , 500 MHz) .....S19

HMBC spectrum ( $\text{CDCl}_3$ , 500 MHz) .....S20

### Preparation of linoleic acid from methyl linoleate

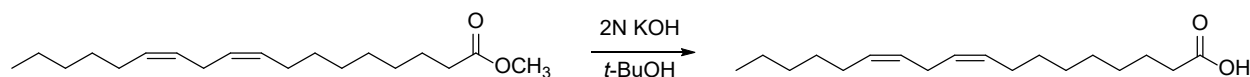

Methyl linoleate (1.00 g), purchased from Tokyo Chemical Industry Co., Ltd. (product code S0325), was dissolved in a 1:1 mixture of *t*-BuOH (5 mL) and 2 N KOH (3 mL) and the solution was stirred for 3 h at an ambient temperature. After removing *t*-BuOH under reduced pressure, the resulting residue was partitioned between EtOAc (20 mL) and 2 N HCl (20 mL). The EtOAc layer was successively washed with water and brine and then slowly passed through anhydrous Na<sub>2</sub>SO<sub>4</sub> to give linoleic acid (1.04 g), which was used for the next step without further purification.

### Chiral $\alpha$ -linoleyl- $\alpha'$ , $\beta$ -*O*-isopropylidene glycerols **2a** and **2b**

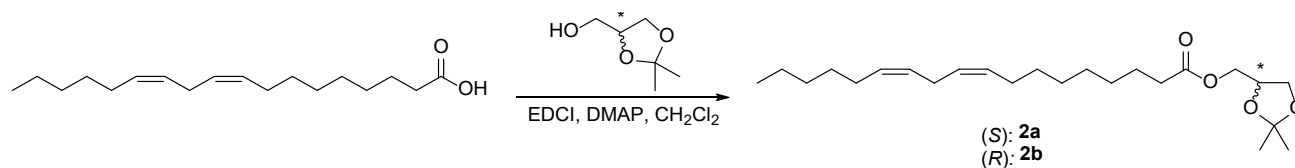

To the solution of linoleic acid (112.8 mg, 0.402 mmol for **2a**; 122.2 mg, 0.436 mmol for **2b**) in CH<sub>2</sub>Cl<sub>2</sub> (3 mL) was added (*R*)- or (*S*)-solketal (2,2-dimethyl-1,3-dioxolane-4-methanol, Tokyo Chemical Industry, product codes D1705 and D1691, respectively: 59 mg, 0.45 mmol; 1.1 equiv), 1-ethyl-3-(3-dimethylaminopropyl)carbodiimide hydrochloride (86.9 mg, 0.45 mmol; 1.1 equiv), and one crystal of *N,N*-dimethyl-4-aminopyridine (DMAP,  $\approx$  5 mg), and the reaction mixture was stirred for 2.5 h at ambient temperature. After removing the solvent under reduced pressure, the resulting concentrate was passed through a short column of silica gel to remove DMAP and 1-(3-(dimethylamino)propyl)-3-ethylurea. The eluate was concentrated and purified by ODS-HPLC (solvent: 95%MeCN) to give 1-linoleoyl-2,3-*O*-isopropylidene-*sn*-glycerol (**2a**, 90.6 mg, 57.5%) and 3-linoleoyl-1,2-*O*-isopropylidene-*sn*-glycerol (**2b**, 125.0 mg, 72.7%), respectively [34].

1-Linoleoyl-2,3-*O*-isopropylidene-*sn*-glycerol (**2a**): [ $\alpha$ ]<sub>D</sub><sup>23.7</sup> 0.69 (*c* 1.0, MeOH); HRESIMS: *m/z* 417.2969 [M + Na]<sup>+</sup> (calcd for C<sub>24</sub>H<sub>42</sub>NaO<sub>4</sub>, 417.2975). IR (ATR)  $\nu_{\max}$  3010, 2987, 2929, 2856, 1743, 1458, 1381, 1372, 1254 sh, 1215, 1161, 1087, 1059, 976, 844, 726 cm<sup>-1</sup>. <sup>1</sup>H and <sup>13</sup>C NMR data are essentially the same as **2b**.

3-Linoleoyl-1,2-*O*-isopropylidene-*sn*-glycerol (**2b**): [ $\alpha$ ]<sub>D</sub><sup>23.7</sup> -0.64 (*c* 1.0, MeOH); HRESIMS: *m/z* 417.2961 [M + Na]<sup>+</sup> (calcd for C<sub>24</sub>H<sub>42</sub>NaO<sub>4</sub>, 417.2975). IR (ATR)  $\nu_{\max}$  3010, 2987, 2929, 2857, 1743, 1458, 1381, 1372, 1254 sh, 1215, 1161, 1085, 1058, 977, 844, 727 cm<sup>-1</sup>; <sup>1</sup>H and <sup>13</sup>C NMR, see Table S1.

### Chiral $\alpha$ -linoleoylglycerols **3a** and **3b**

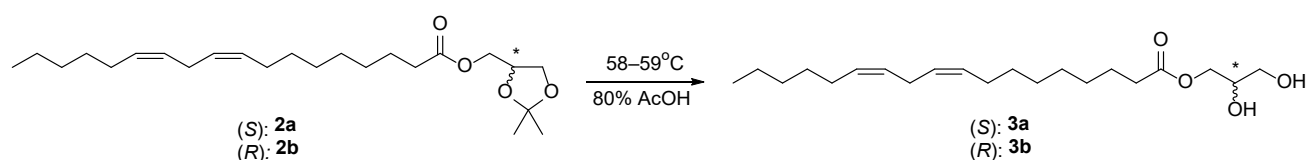

Compound **2a** (5.9 mg, 15.0  $\mu$ mol) or **2b** (6.2 mg, 15.7  $\mu$ mol) was dissolved in 80% aqueous acetic acid (2 mL) and the solution was stirred occasionally in a sealed 6-mL screw-capped vial at 58–59 °C for 30 min. After removing the solvents by a stream of N<sub>2</sub> gas, the resulting concentrate was purified by silica gel-HPLC (Cosmosil SL-II  $\emptyset$  1  $\times$  25 cm) eluted with *n*-hexane/EtOAc 1:1 (4 mL/min) monitored at 210 nm to give 1-linoleoyl-*sn*-glycerol (**3a**, 4.3 mg, 81.1%) or 3-

linoleoyl-*sn*-glycerol (**3b**, 5.1 mg, 91.6%), respectively [1-4].

1-Linoleoyl-*sn*-glycerol (**3a**):  $[\alpha]^{22.2}_D +5.5$  (*c* 0.30, MeOH); HRESIMS:  $m/z$  377.2652  $[M + Na]^+$  (calcd for  $C_{21}H_{38}NaO_4$ , 377.2662). IR (ATR)  $\nu_{max}$  3404, 3010, 2927, 2856, 1740, 1458, 1378, 1243, 1177, 1118, 1052, 726  $cm^{-1}$ ;  $^1H$  and  $^{13}C$  NMR, see Table S1.

3-Linoleoyl-*sn*-glycerol (**3b**):  $[\alpha]^{22.7}_D -5.5$  (*c* 0.30, MeOH); HRESIMS:  $m/z$  377.2642  $[M + Na]^+$  (calcd for  $C_{21}H_{38}NaO_4$ , 417.2662). IR (ATR)  $\nu_{max}$  3407, 3010, 2926, 2856, 1739, 1458, 1379, 1242, 1177, 1120, 1053, 723  $cm^{-1}$ .  $^1H$  and  $^{13}C$  NMR data are essentially the same as for **3a**.

## References

1. Zhang, G.-L.; Xing, Q.-Y.; Zhang, M.-Z. *Phytochemistry*, **1997**, *45*, 1213–1215.
2. Kim, C.; Ha, H.; Kim, J. S.; Kim, Y. T.; Kwon, S.-C.; Park, W.-W. *Arch. Pharm. Res.* **2003**, *26*, 34–39.
3. Fraser, B. H.; Perlmutter, P.; Wijesundera, C. *J. Am. Oil Chem. Soc.* **2007**, *84*, 11–21.
4. Degenhardt, A. G.; Hofmann, T.; *J. Agric. Food Chem.* **2010**, *58*, 12906–12915.

**Table S1:** <sup>1</sup>H (500 MHz) and <sup>13</sup>C (125 MHz) NMR data for compounds **2b** and **3a** in CDCl<sub>3</sub>.

| Position                   | <b>2b</b>           |                                                      | <b>3a</b>          |                                                      |
|----------------------------|---------------------|------------------------------------------------------|--------------------|------------------------------------------------------|
|                            | $\delta_C$          | $\delta_H^a$                                         | $\delta_C$         | $\delta_H^a$                                         |
| 1                          | 173.6               |                                                      | 173.4              |                                                      |
| 2                          | 34.1                | 2.34, t (7.6), 2H                                    | 34.1               | 2.35, t (7.6), 2H                                    |
| 3                          | 24.9                | 1.62, brqui (7.3), 2H                                | 24.9               | 1.63, brqui (7.2), 2H                                |
| 4                          | 29.081 <sup>b</sup> | 1.30, ovl                                            | 29.12              | 1.3068, ovl                                          |
| 5                          | 29.087 <sup>b</sup> | 1.30, ovl                                            | 29.06              | 1.3076, ovl                                          |
| 6                          | 29.1                | 1.30, ovl                                            | 29.06              | 1.3076, ovl                                          |
| 7                          | 29.3 <sup>c</sup>   | 1.32, ovl, 2H                                        | 29.3 <sup>i</sup>  | 1.31, ovl, 2H                                        |
| 8                          | 27.19 <sup>d</sup>  | 2.05, ovl, 2H                                        | 27.18 <sup>j</sup> | 2.05, ovl, 2H                                        |
| 9                          | 130.2 <sup>e</sup>  | 5.38 <sup>f</sup> , m, 1H                            | 130.2 <sup>k</sup> | 5.38 <sup>l</sup> , m, 1H                            |
| 10                         | 128.1 <sup>g</sup>  | 5.323 <sup>h</sup> , m, 1H                           | 128.1 <sup>m</sup> | 5.348 <sup>n</sup> , m, 1H                           |
| 11                         | 25.6                | 2.77, brt (6.6), 2H                                  | 25.6               | 2.77, brt (6.6), 2H                                  |
| 12                         | 127.9 <sup>g</sup>  | 5.316 <sup>h</sup> , m, 1H                           | 127.9 <sup>m</sup> | 5.32 <sup>n</sup> , m, 1H                            |
| 13                         | 130.0 <sup>e</sup>  | 5.36 <sup>f</sup> , ovl, 1H                          | 130.0 <sup>k</sup> | 5.355 <sup>l</sup> , ovl, 1H                         |
| 14                         | 27.18 <sup>d</sup>  | 2.05, ovl, 2H                                        | 27.15 <sup>j</sup> | 2.05, ovl, 2H                                        |
| 15                         | 29.6 <sup>c</sup>   | 1.33, ovl, 2H                                        | 29.6 <sup>i</sup>  | 1.34, ovl, 2H                                        |
| 16                         | 31.5                | 1.29, ovl, 2H                                        | 31.5               | 1.29, ovl, 2H                                        |
| 17                         | 22.6                | 1.30, ovl, 2H                                        | 22.5               | 1.302, ovl, 2H                                       |
| 18                         | 14.1                | 0.89, t (7.0), 3H                                    | 14.0               | 0.89, t (6.9), 3H                                    |
| <i>sn</i> -1               | 66.4                | 3.74, dd (6.2, 8.4), 1H<br>4.07, dd (6.4, 8.6), 1H   | 63.3               | 3.60, dd (5.8, 11.4), 1H<br>3.70, dd (4.0, 11.5), 1H |
| <i>sn</i> -2               | 73.7                | 4.31, m, 1H                                          | 70.3               | 3.93, m, 1H                                          |
| <i>sn</i> -3               | 64.5                | 4.09, dd (6.0, 11.5), 1H<br>4.16, dd (4.7, 11.5), 1H | 65.2               | 4.15, dd (6.2, 11.7), 1H<br>4.21, dd (4.7, 11.7), 1H |
| acetone-OCO                | 109.8               |                                                      |                    |                                                      |
| acetone-CH <sub>3</sub> -1 | 26.7                | 1.43, s, 3H                                          |                    |                                                      |
| acetone-CH <sub>3</sub> -2 | 25.4                | 1.37, s, 3H                                          |                    |                                                      |

<sup>a</sup>Chemical shift in ppm, multiplicity (*J* in Hz), integral. <sup>b-m</sup>Interchangeable.

# Mass Spectrum Molecular Formula Report

## Analysis Info

|                   |                                                                                |
|-------------------|--------------------------------------------------------------------------------|
| Analysis Name     | D:\Data\igarashi lab\Hayashi Saki\LC-MS\42A-22-2 HR\42A-22-2 pos-2_1_01_4295.d |
| Method            | lcms_esi_pos_wide.m                                                            |
| Sample Name       | 42A-22-2 pos-2                                                                 |
| Comment           |                                                                                |
| Acquisition Date  | 2/2/2016 2:55:26 PM                                                            |
| Operator          | Bruker Customer                                                                |
| Instrument / Ser# | micrOTOF 210                                                                   |

## Acquisition Parameter

|             |            |                      |          |                  |            |
|-------------|------------|----------------------|----------|------------------|------------|
| Source Type | ESI        | Ion Polarity         | Positive | Set Nebulizer    | 1.2 Bar    |
| Focus       | Not active |                      |          | Set Dry Heater   | 200 °C     |
| Scan Begin  | 50 m/z     | Set Capillary        | 4500 V   | Set Dry Gas      | 10.0 l/min |
| Scan End    | 3000 m/z   | Set End Plate Offset | -500 V   | Set Divert Valve | Source     |

## Generate Molecular Formula Parameter

|                  |            |                        |       |         |   |
|------------------|------------|------------------------|-------|---------|---|
| Formula, min.    | C18H32O3Na |                        |       |         |   |
| Formula, max.    | C20H36O5Na |                        |       |         |   |
| Measured m/z     | 349.235    | Tolerance              | 4 mDa | Charge  | 1 |
| Check Valence    | no         | Minimum                | 0     | Maximum | 0 |
| Nitrogen Rule    | no         | Electron Configuration | both  |         |   |
| Filter H/C Ratio | no         | Minimum                | 0     | Maximum | 3 |
| Estimate Carbon  | yes        |                        |       |         |   |

| Sum Formula        | Sigma | m/z      | Err [ppm] | Mean Err [ppm] | Err [mDa] | rdb  | N Rule | e <sup>-</sup> |
|--------------------|-------|----------|-----------|----------------|-----------|------|--------|----------------|
| C 19 H 34 Na 1 O 4 | 0.009 | 349.2349 | 0.24      | 0.36           | 0.08      | 2.50 | ok     | even           |

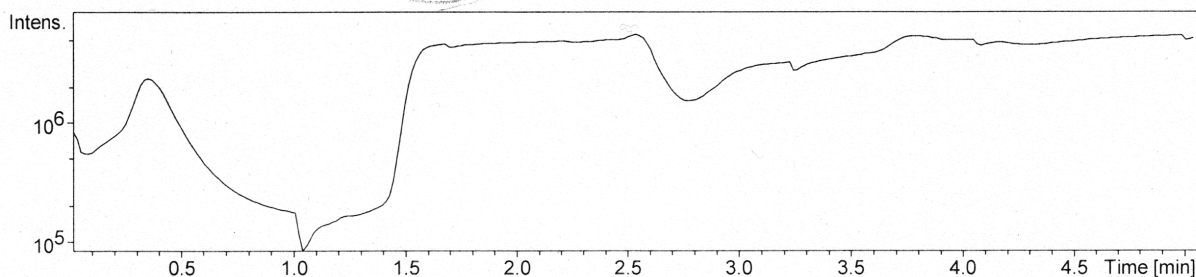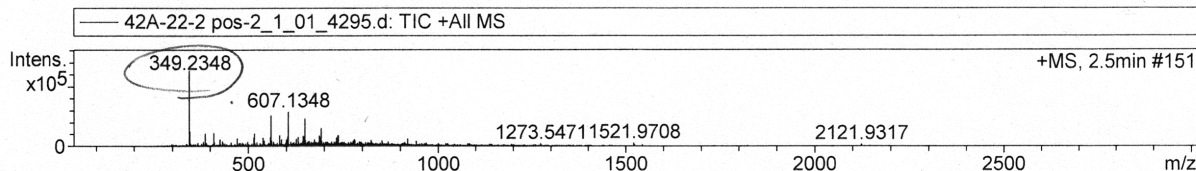

Positive ion HRESITOFMS spectrum of nostochopcerol (1)

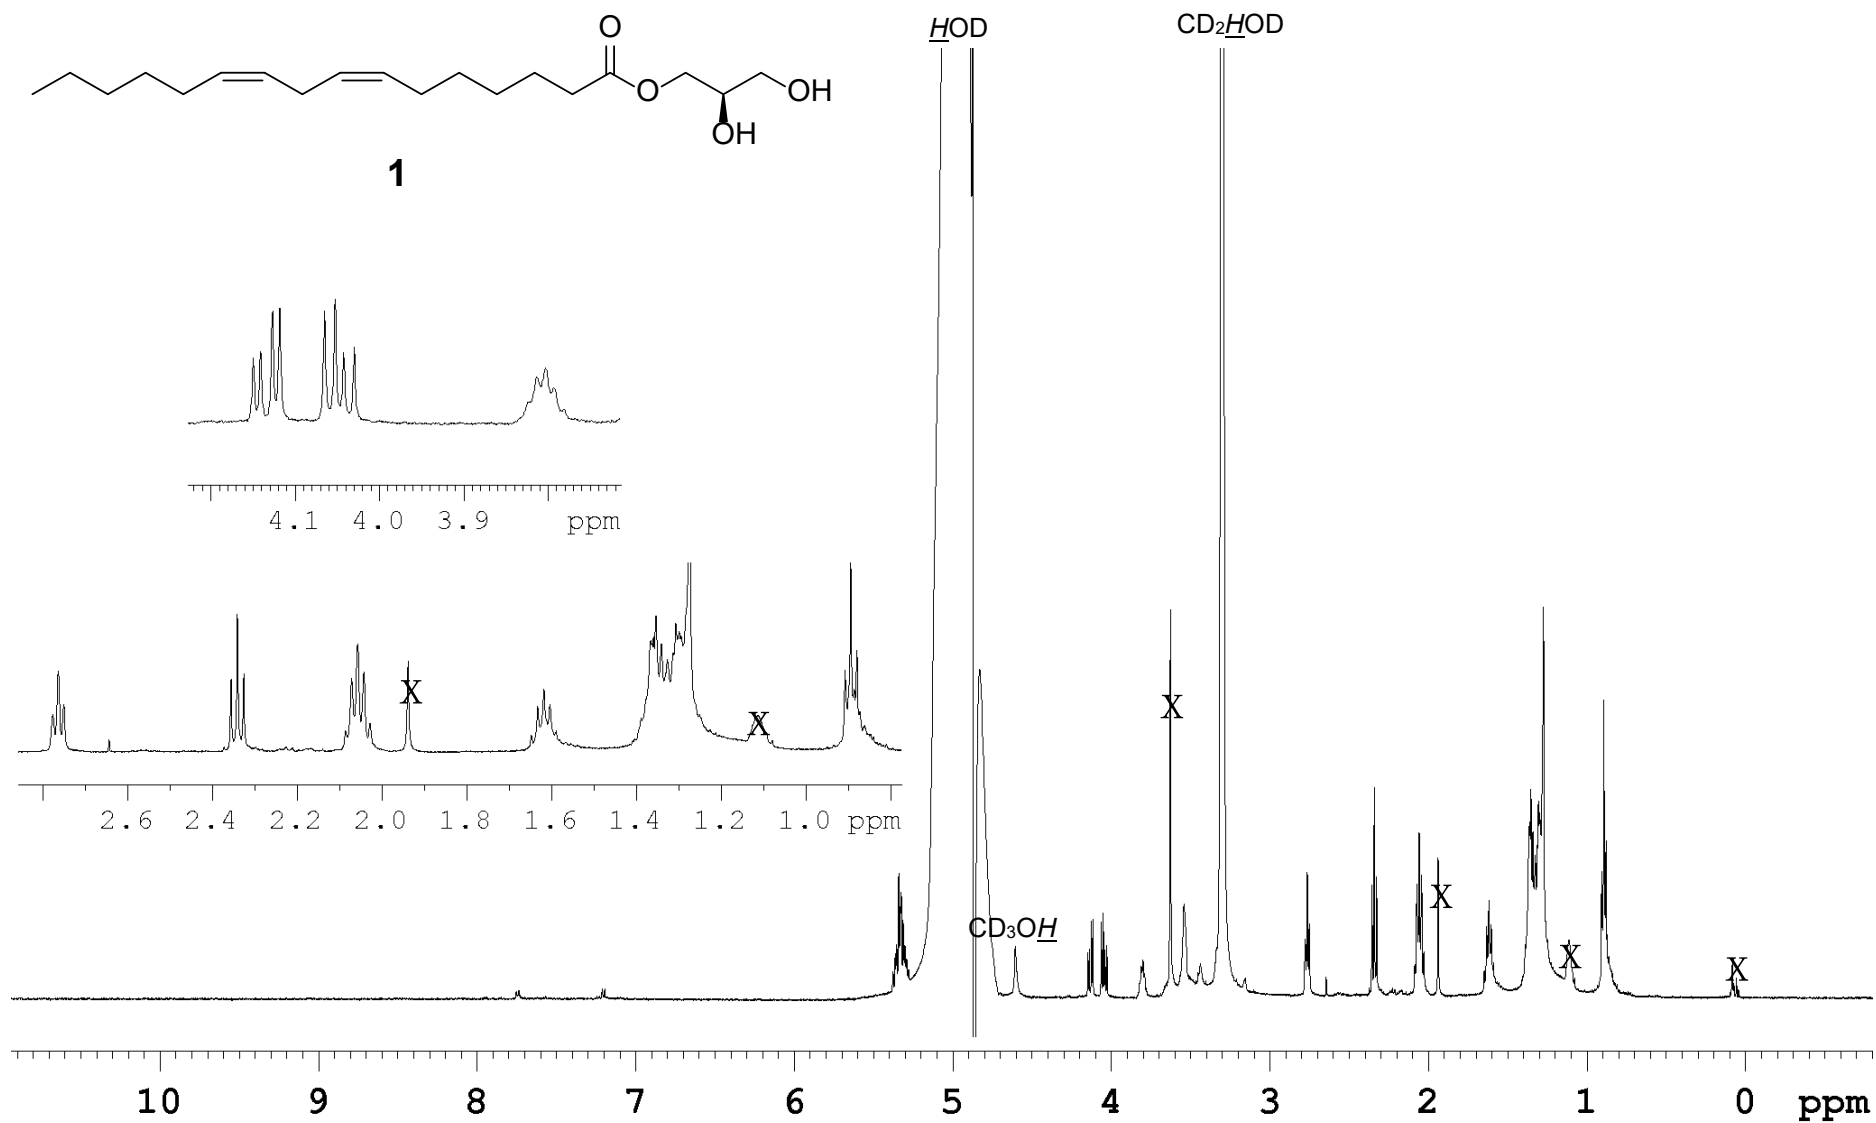

<sup>1</sup>H NMR spectrum of nostochopcerol (**1**) (500 MHz, CD<sub>3</sub>OH)

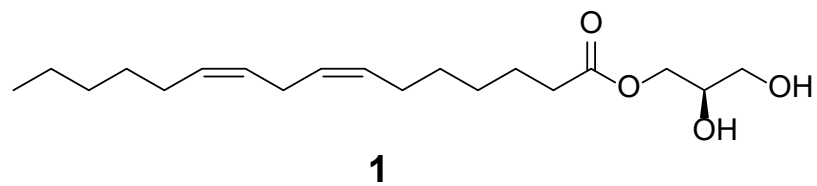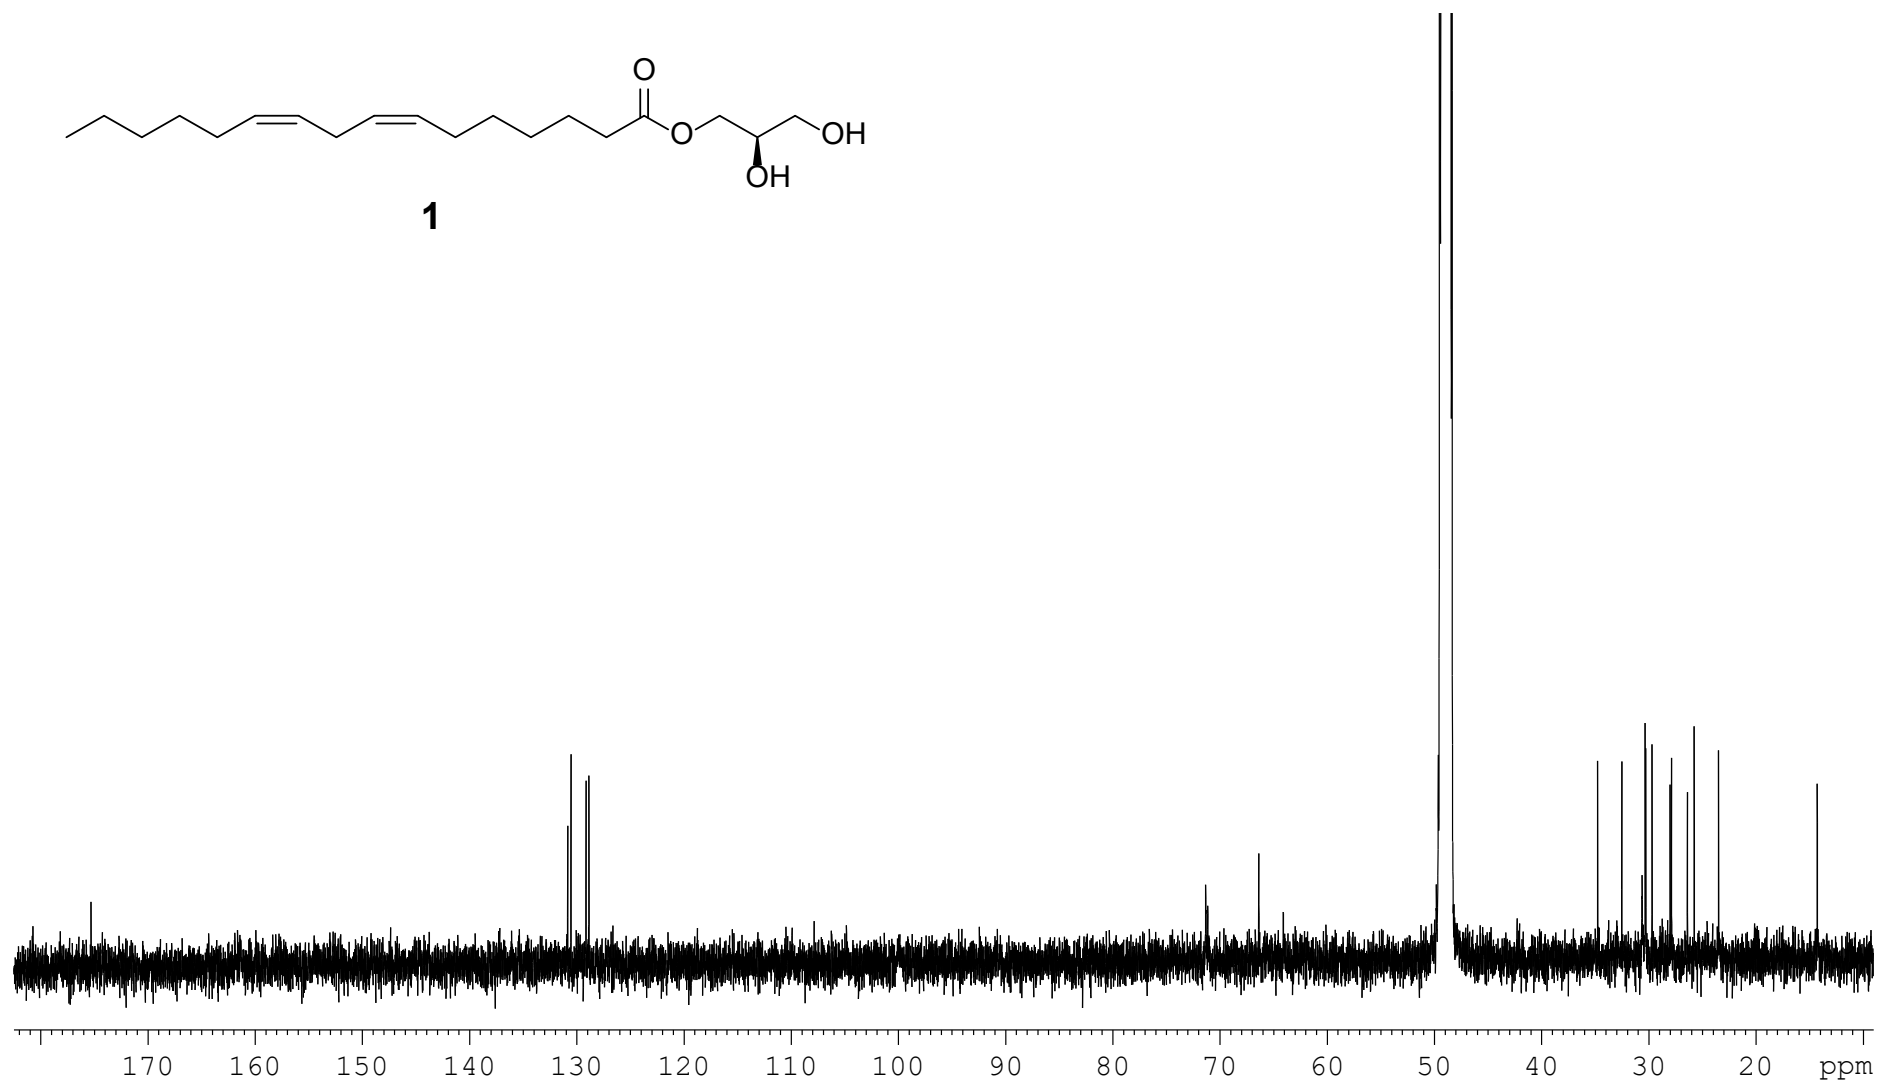

<sup>13</sup>C NMR spectrum of nostochopcerol (**1**) (125 MHz, CD<sub>3</sub>OH)



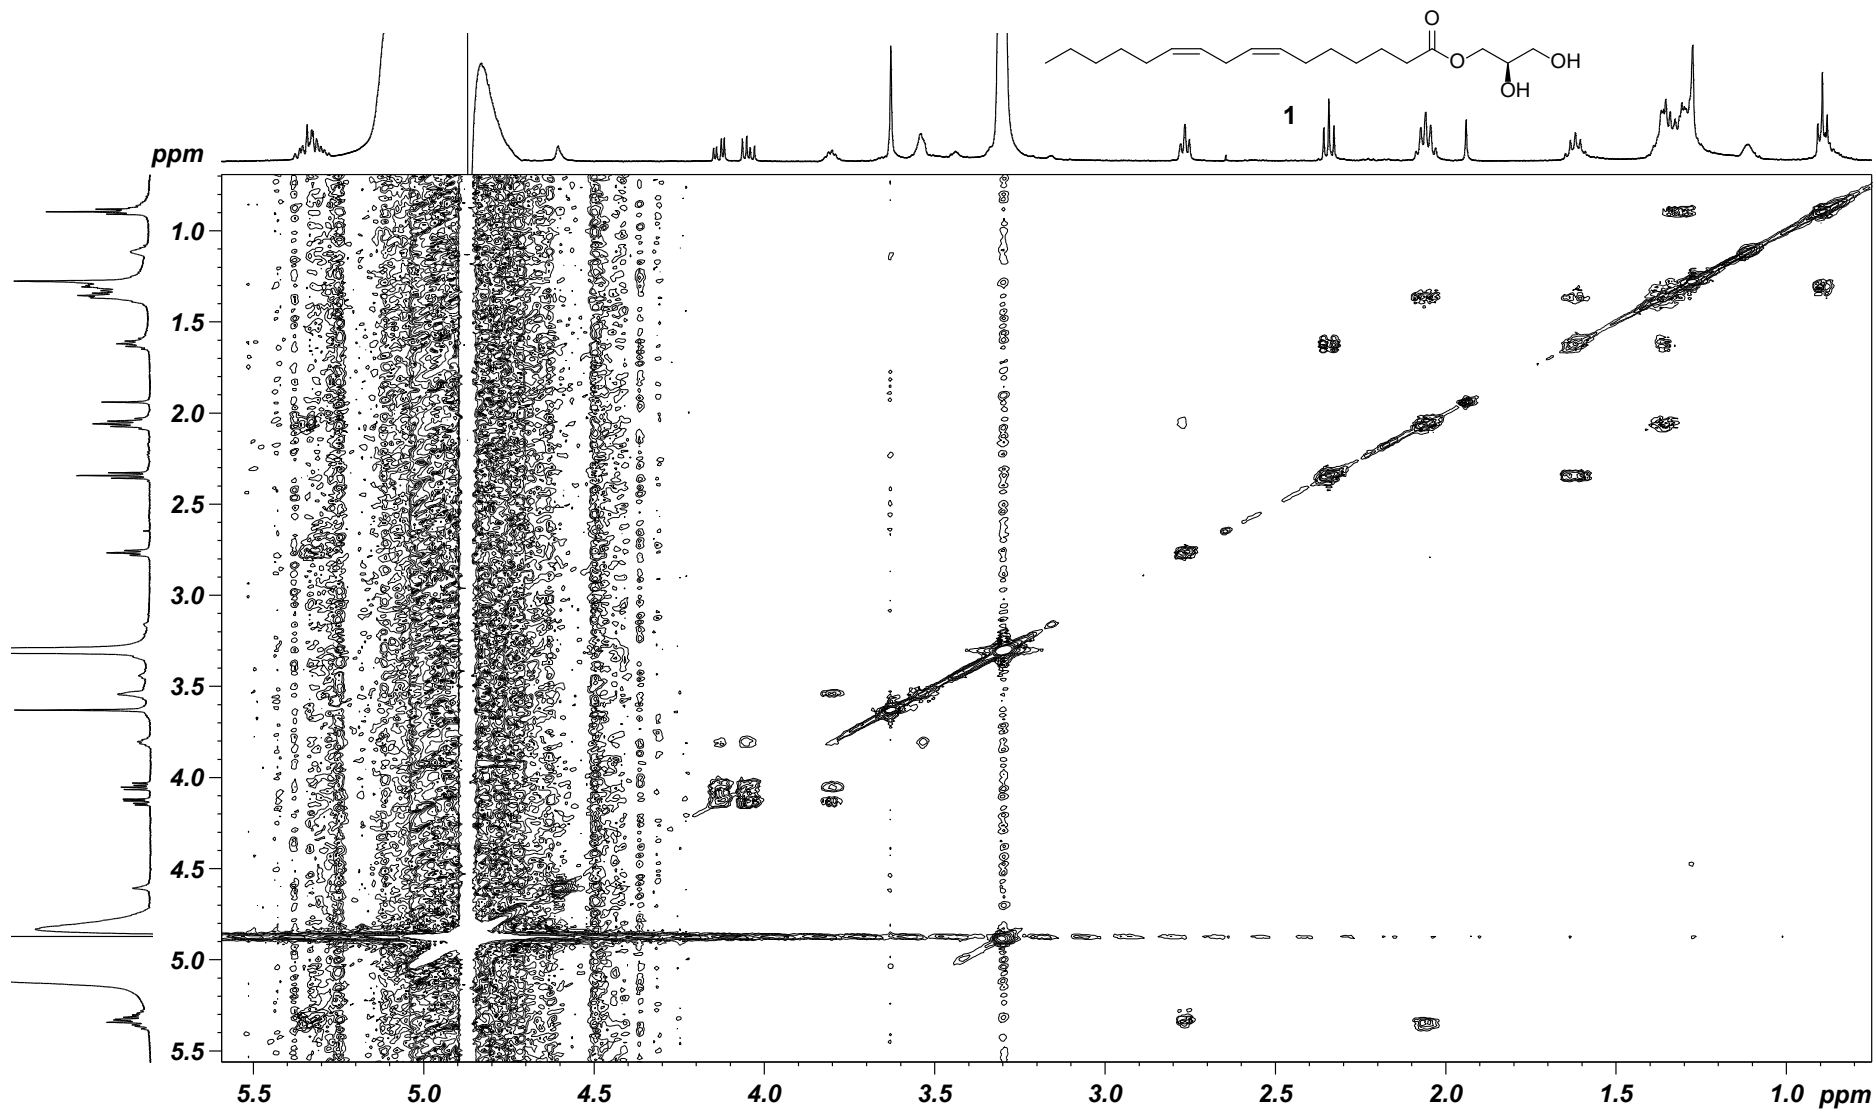

COSY spectrum of nostochopcerol (1) (500 MHz, CD<sub>3</sub>OH)

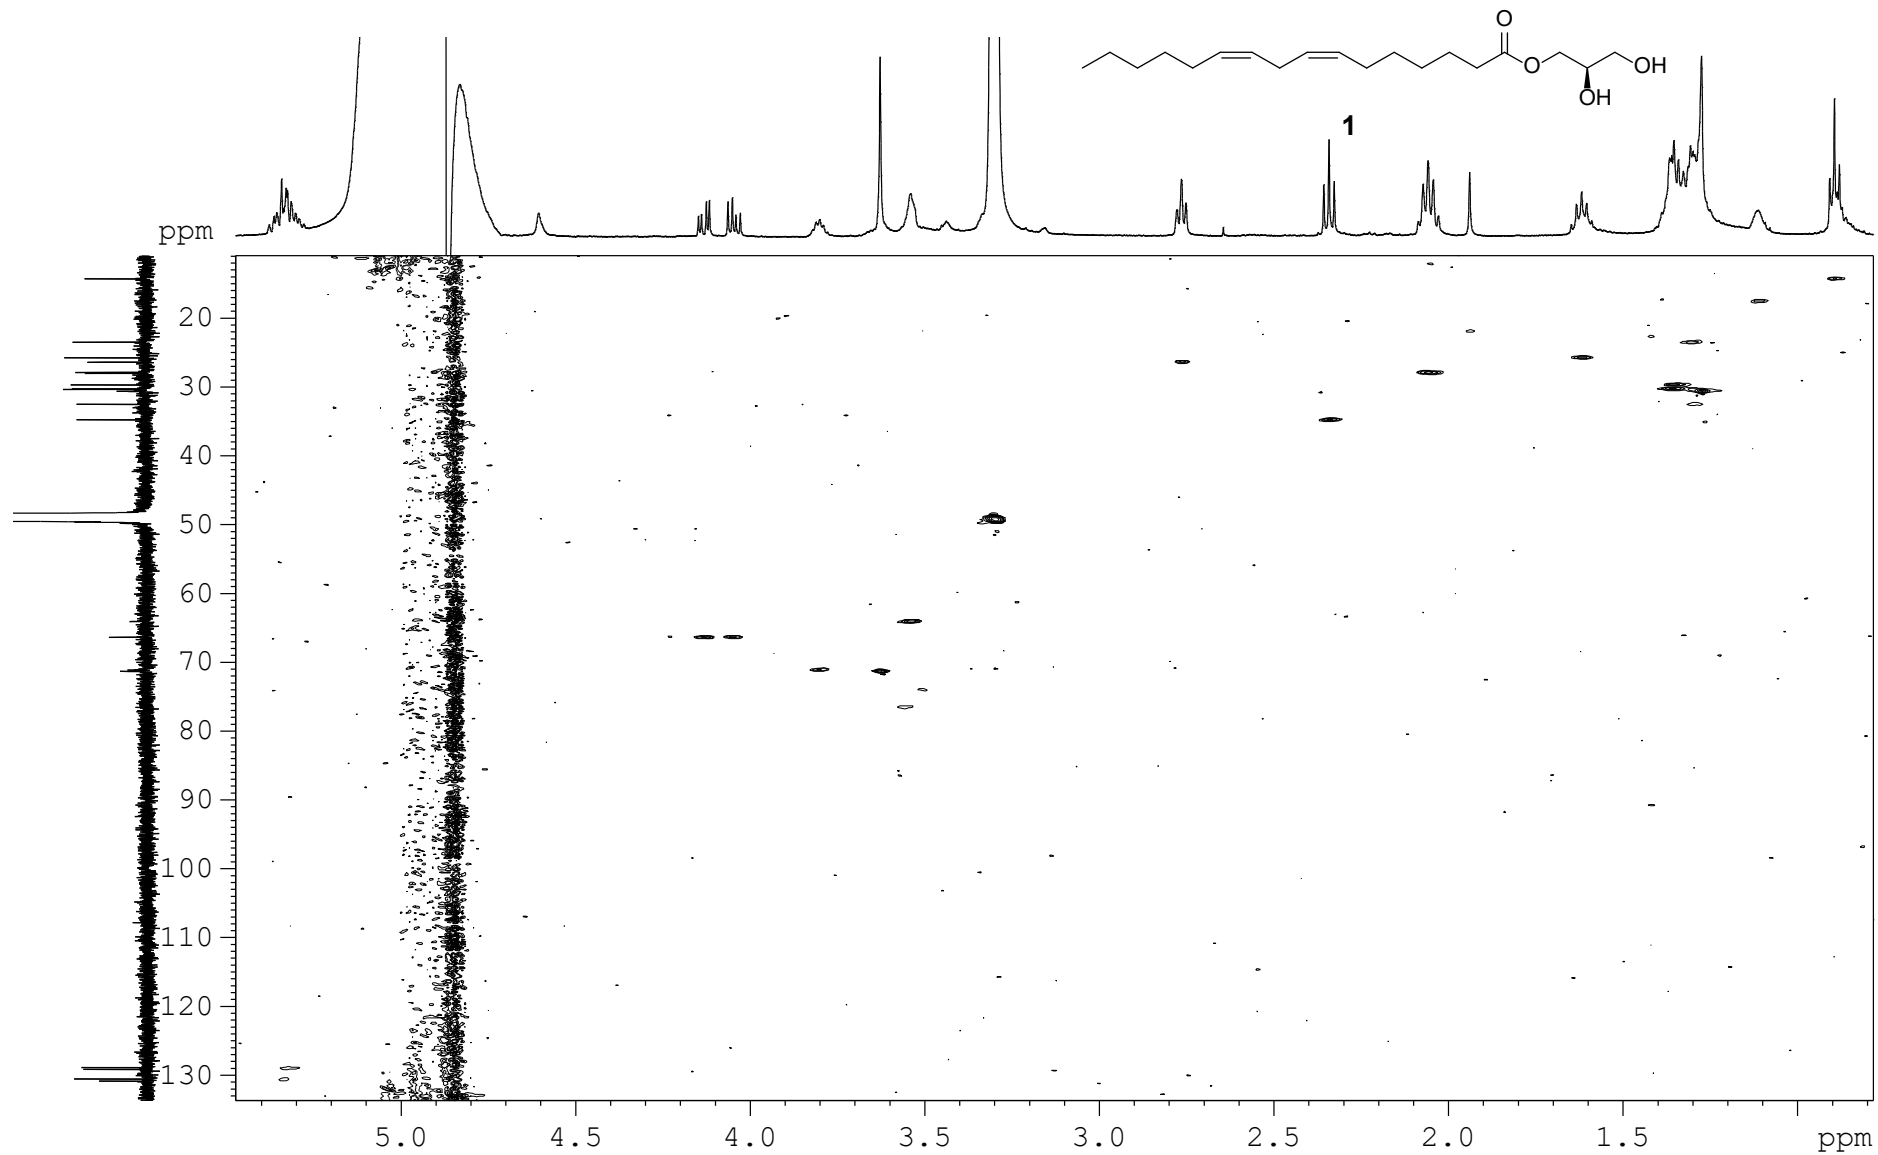

HSQC spectrum of nostochopcerol (1) (500 MHz, CD<sub>3</sub>OH)

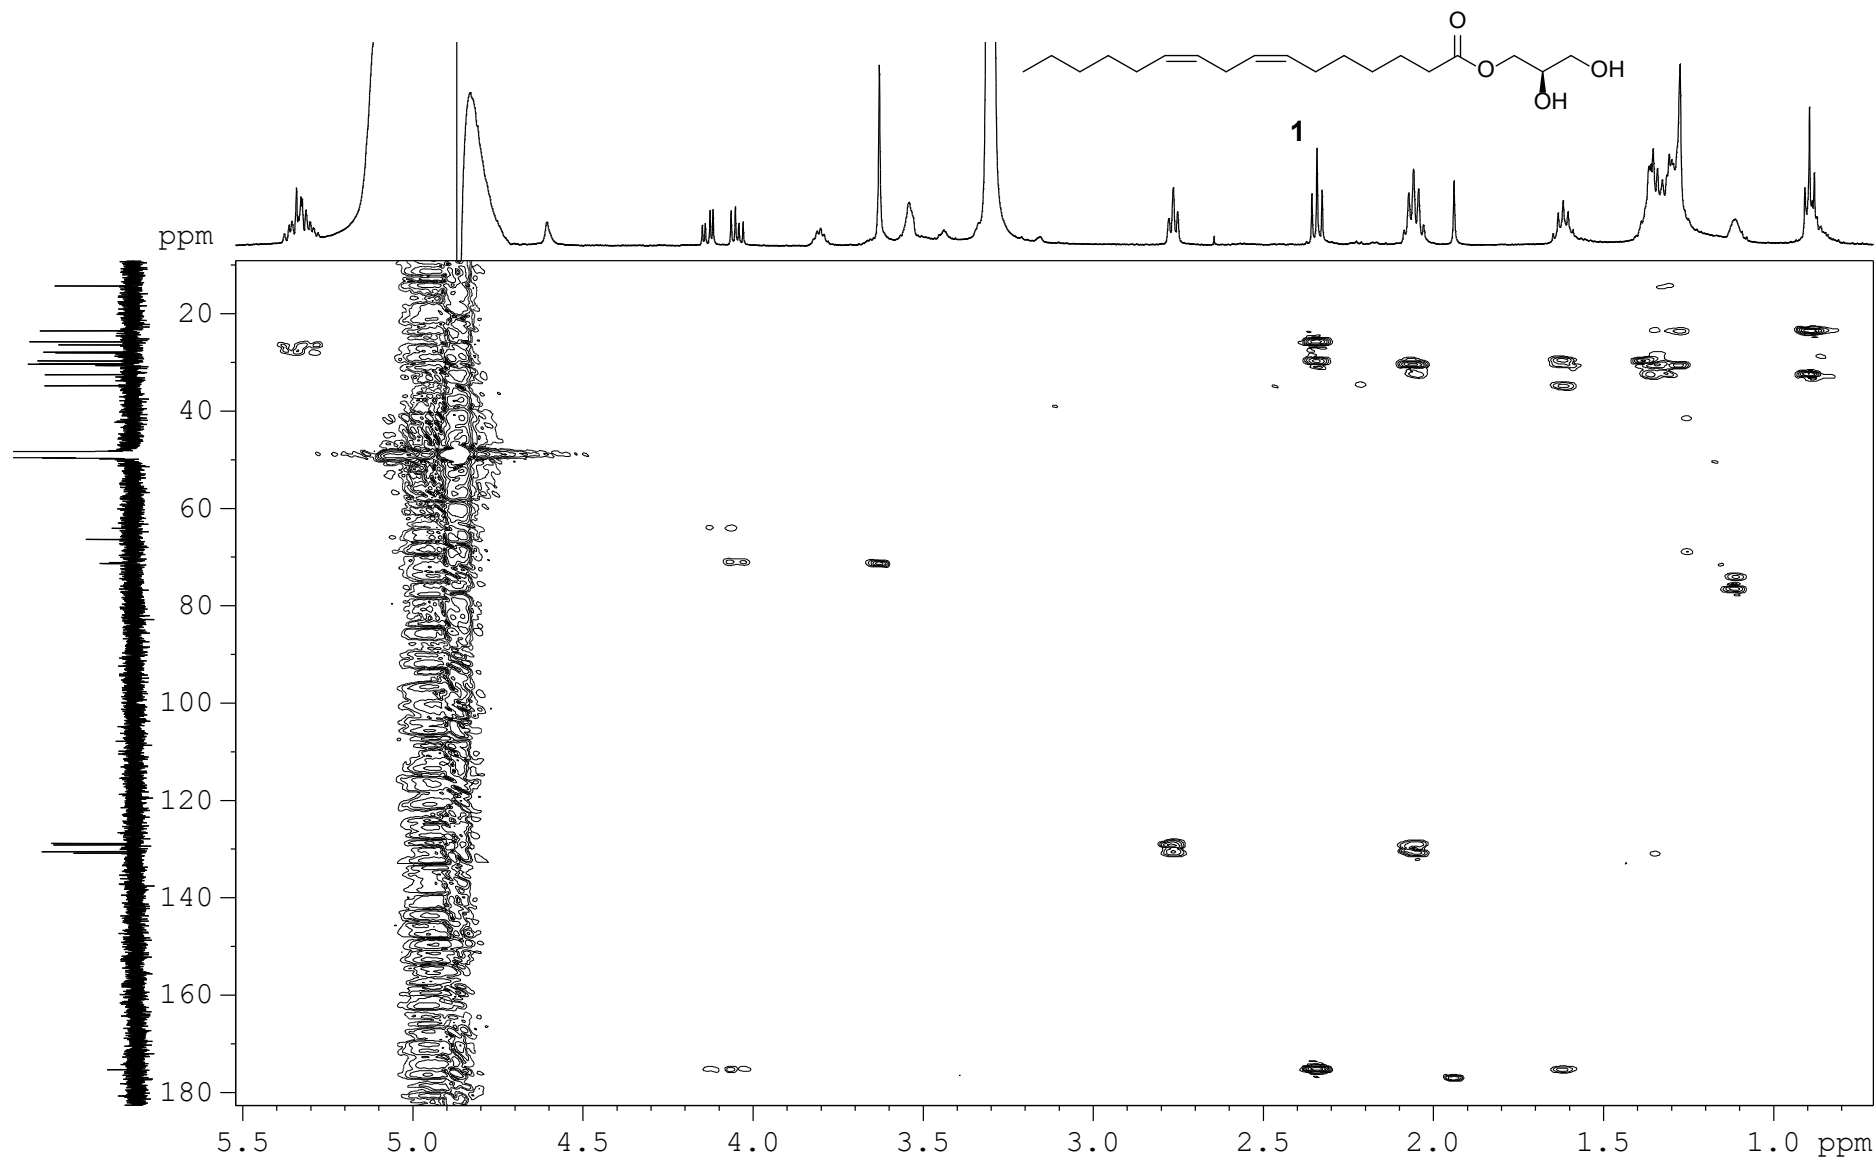

HMBC spectrum of nostochopcerol (1) (500 MHz, CD<sub>3</sub>OH)

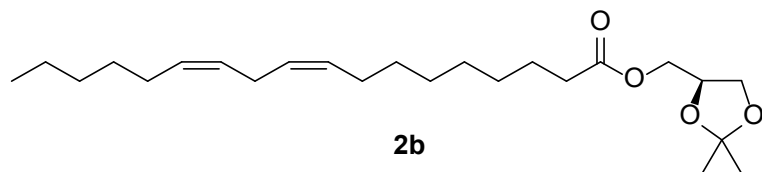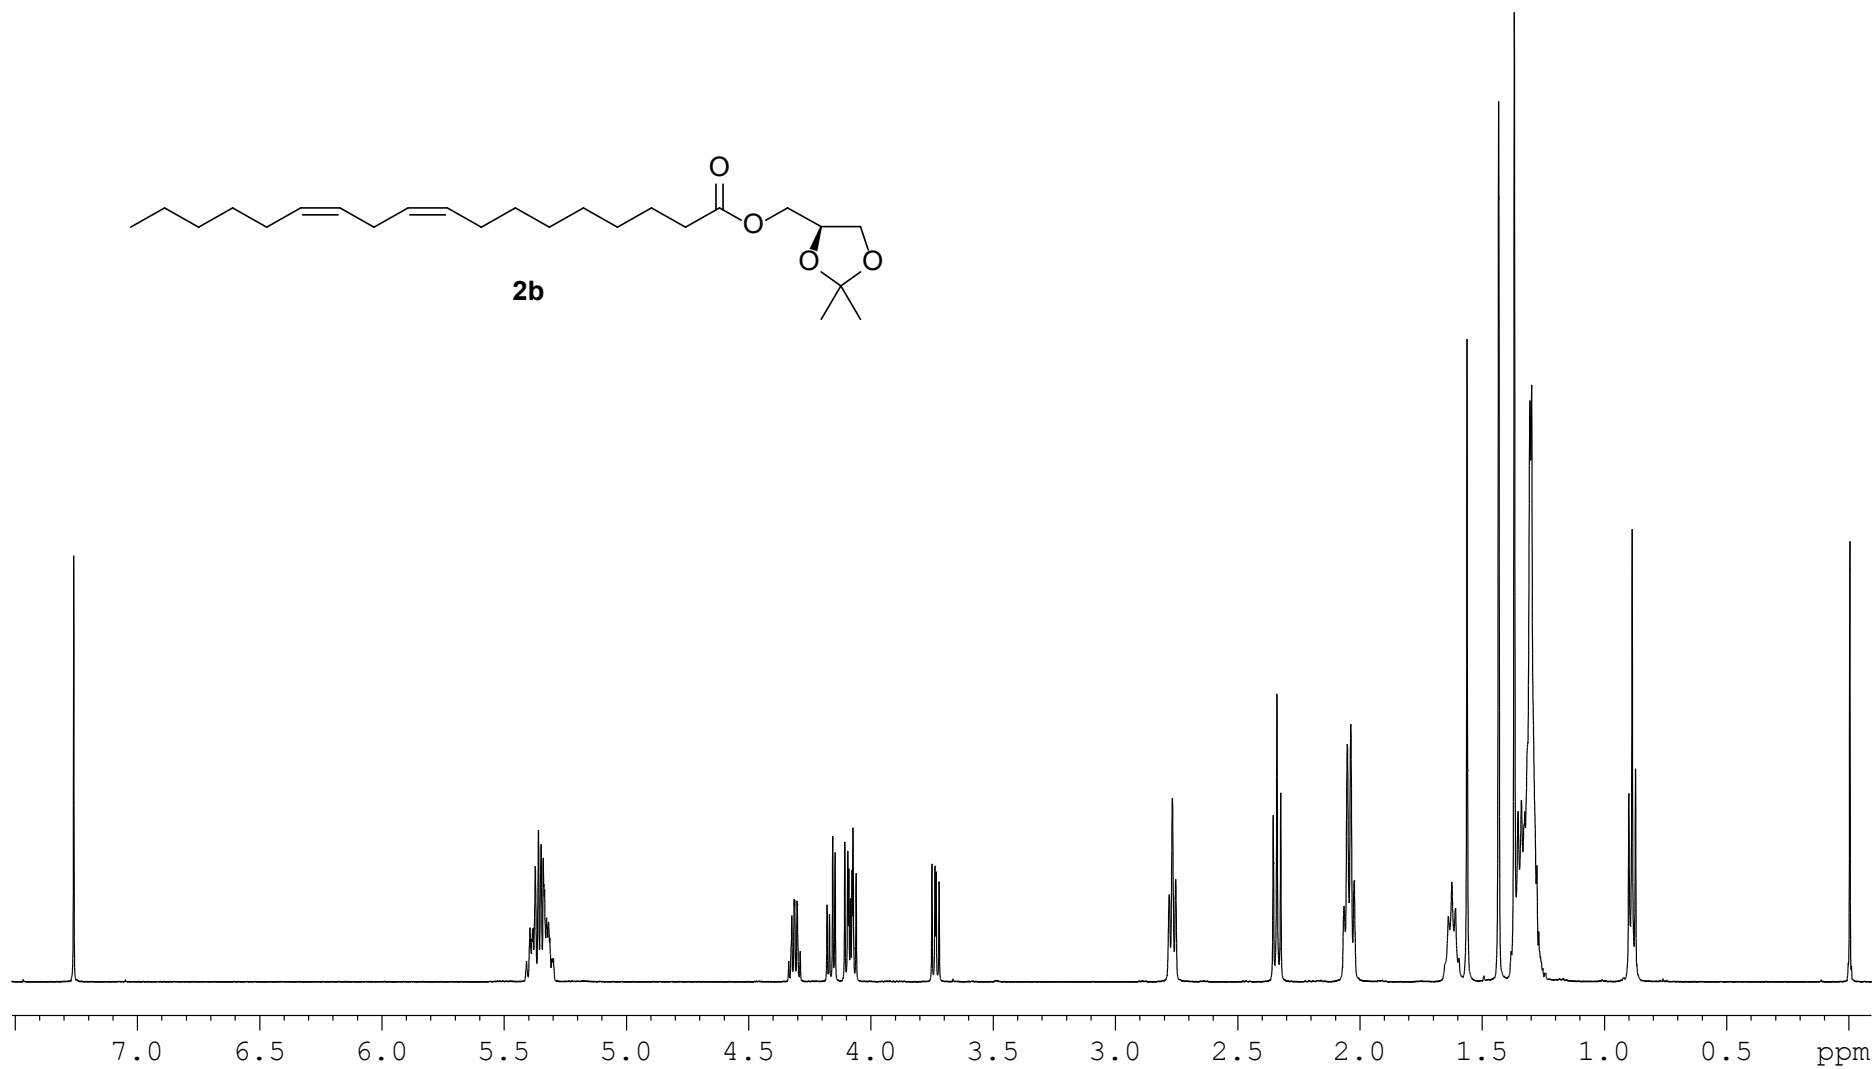

$^1\text{H}$  NMR spectrum of 3-linoleoyl-1,2-*O*-isopropylidene-*sn*-glycerol (**2b**) (500 MHz,  $\text{CDCl}_3$ )

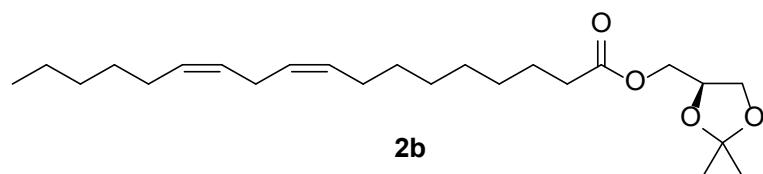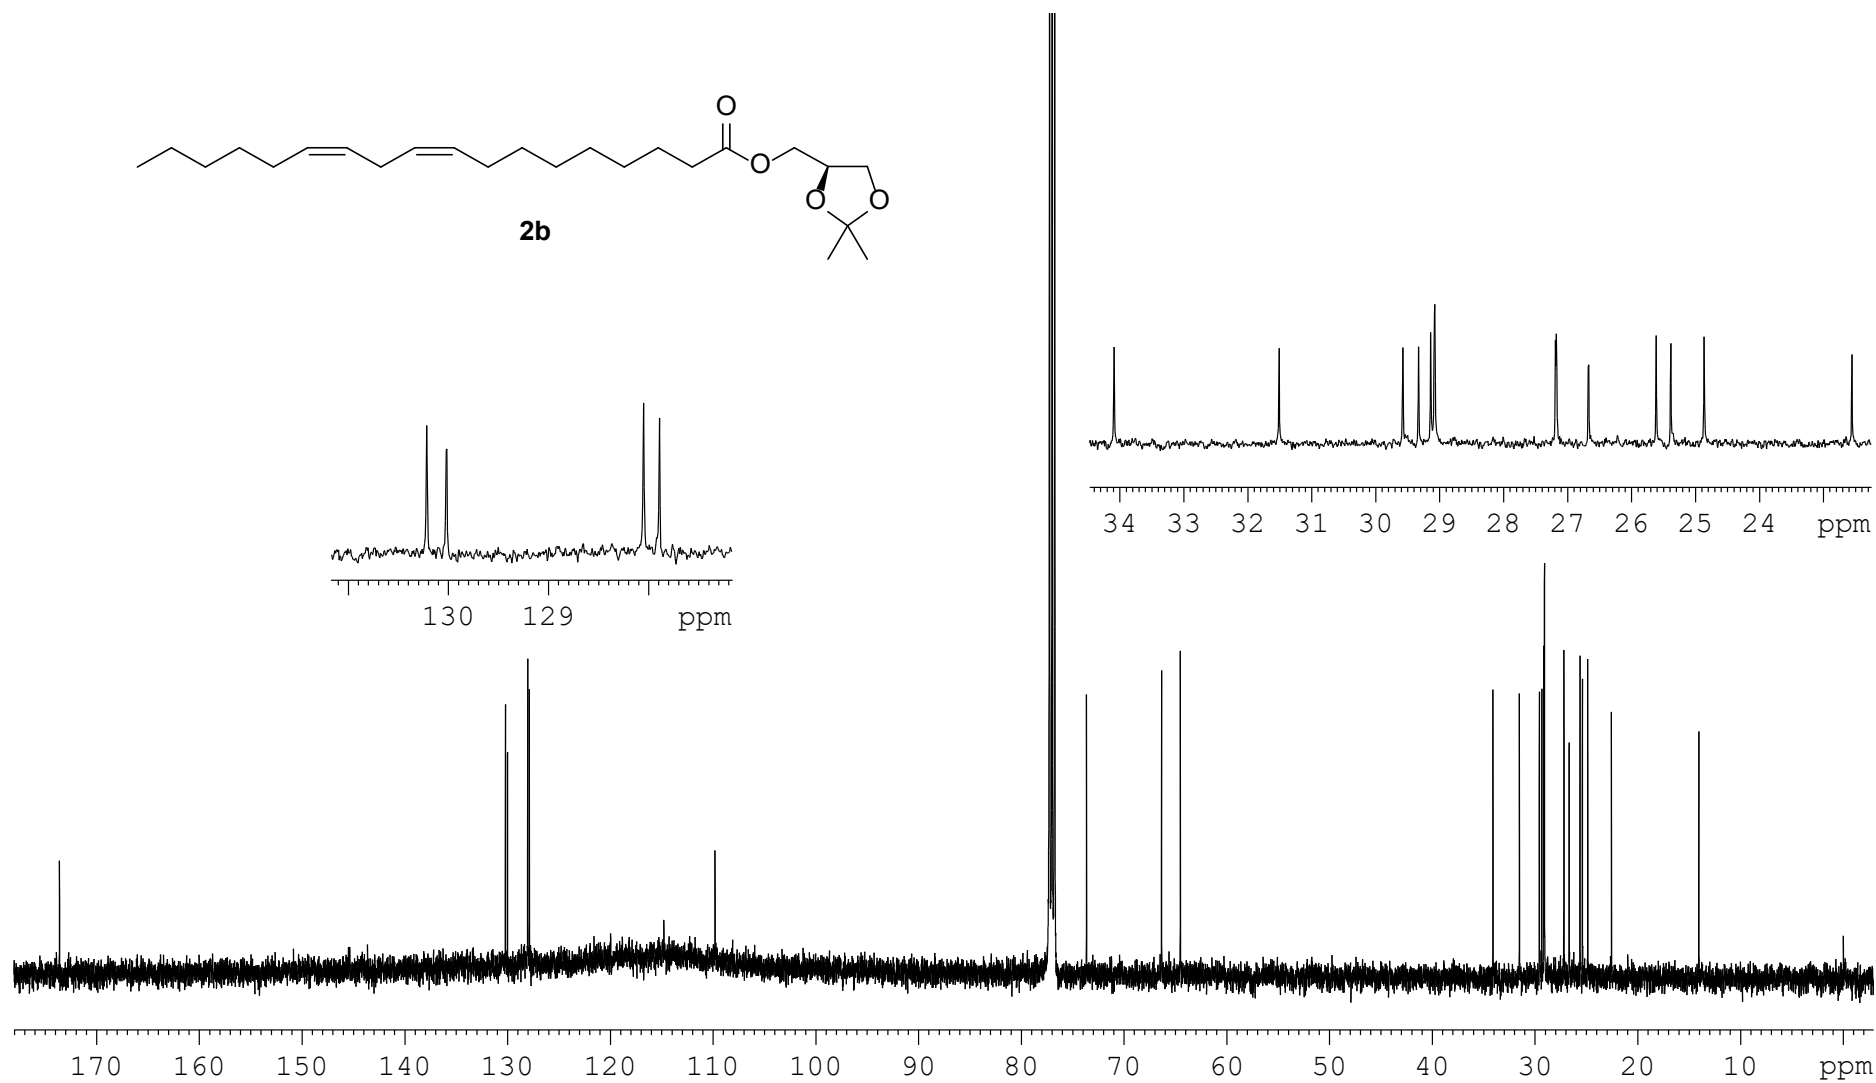

$^{13}\text{C}$  NMR spectrum of 3-linoleoyl-1,2-*O*-isopropylidene-*sn*-glycerol (**2b**) (500 MHz,  $\text{CDCl}_3$ )

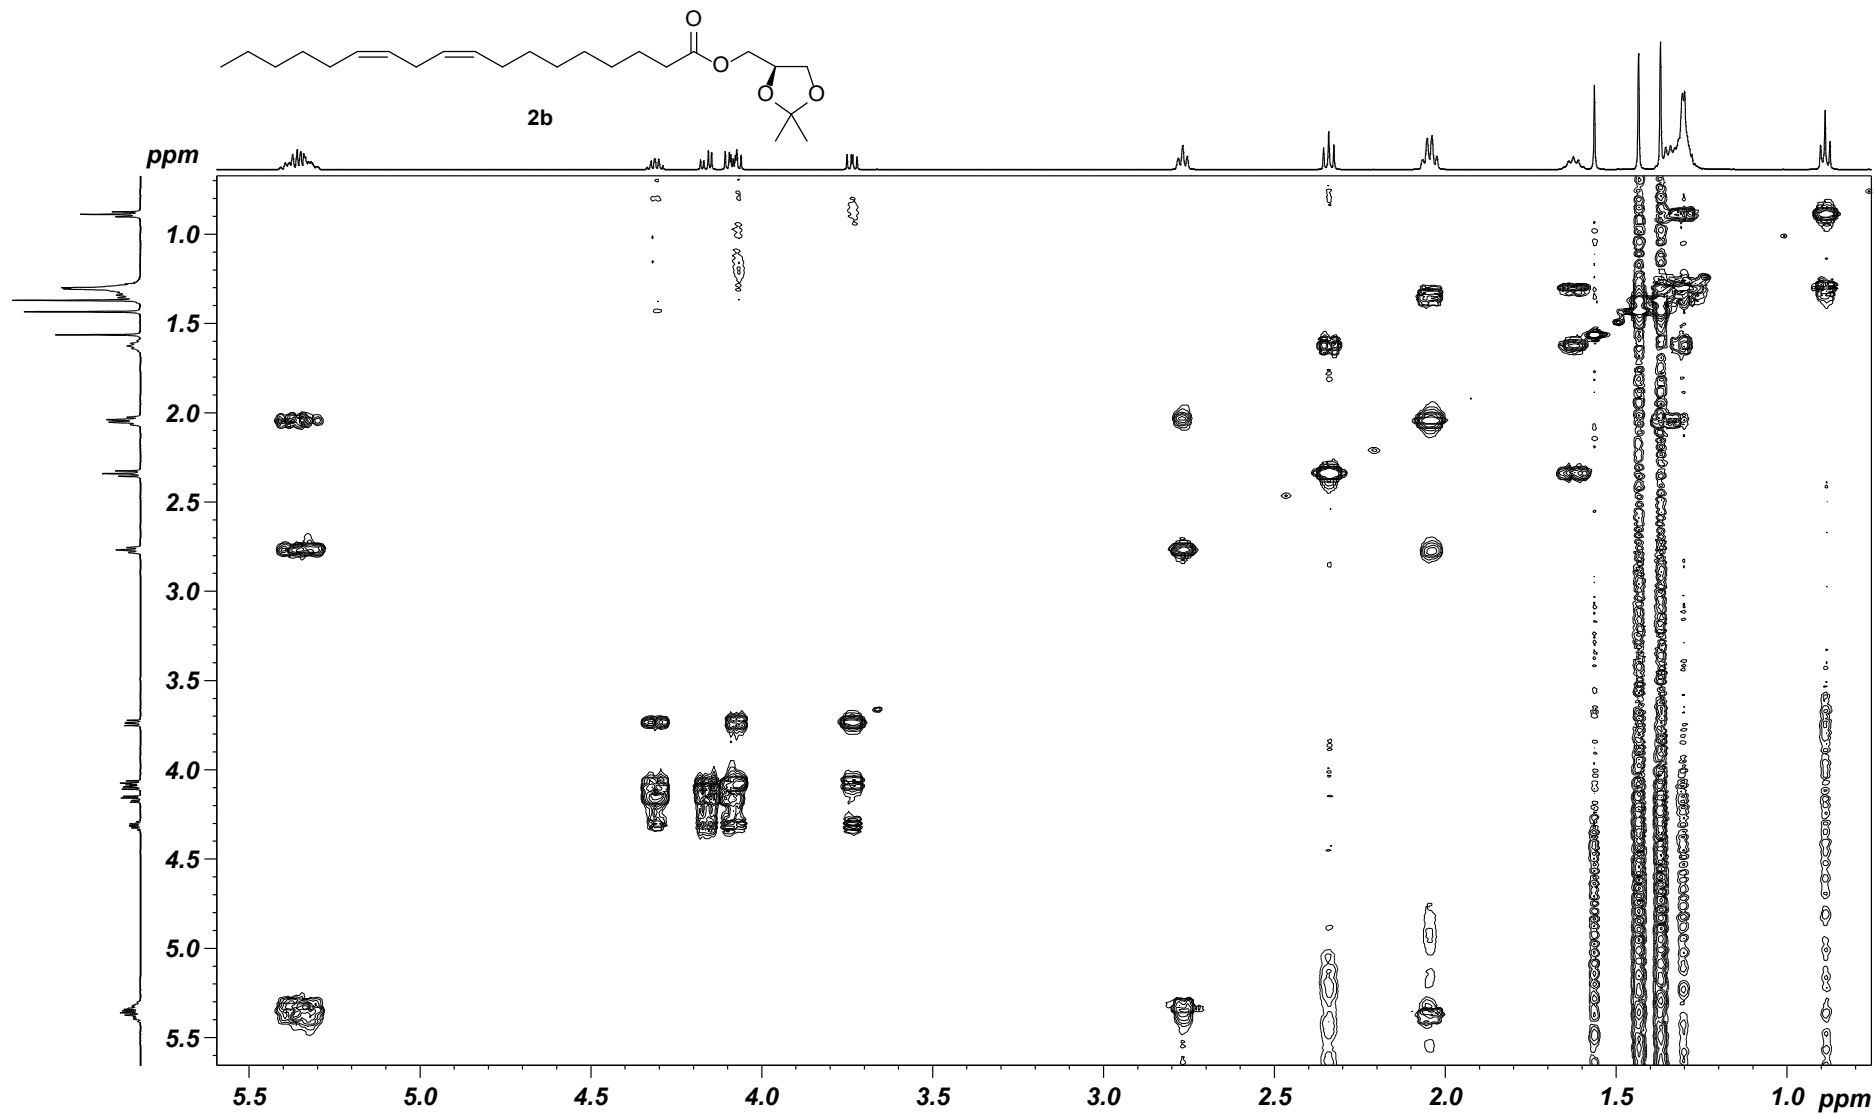

COSY45 spectrum of 3-linoleoyl-1,2-*O*-isopropylidene-*sn*-glycerol (**2b**) (500 MHz, CDCl<sub>3</sub>)

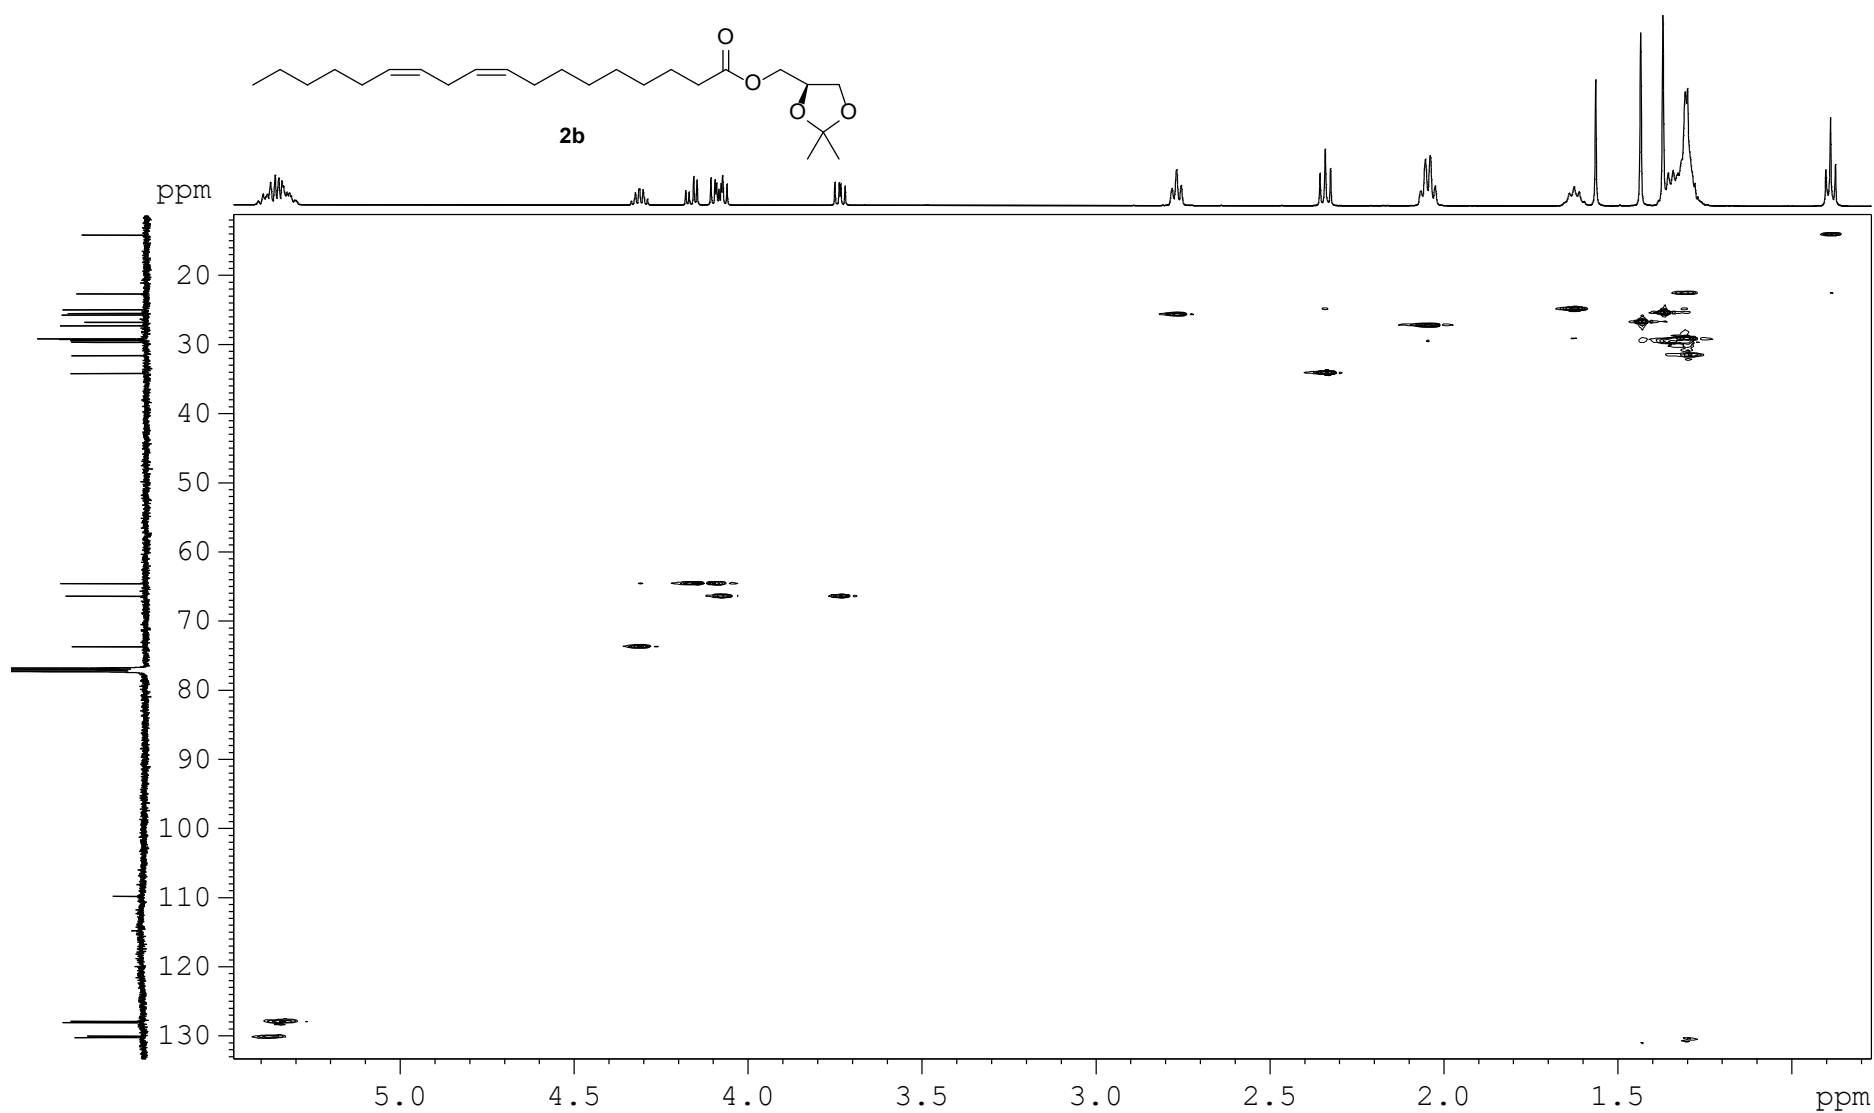

HSQC spectrum of 3-linoleoyl-1,2-*O*-isopropylidene-*sn*-glycerol (**2b**) (500 MHz, CDCl<sub>3</sub>)

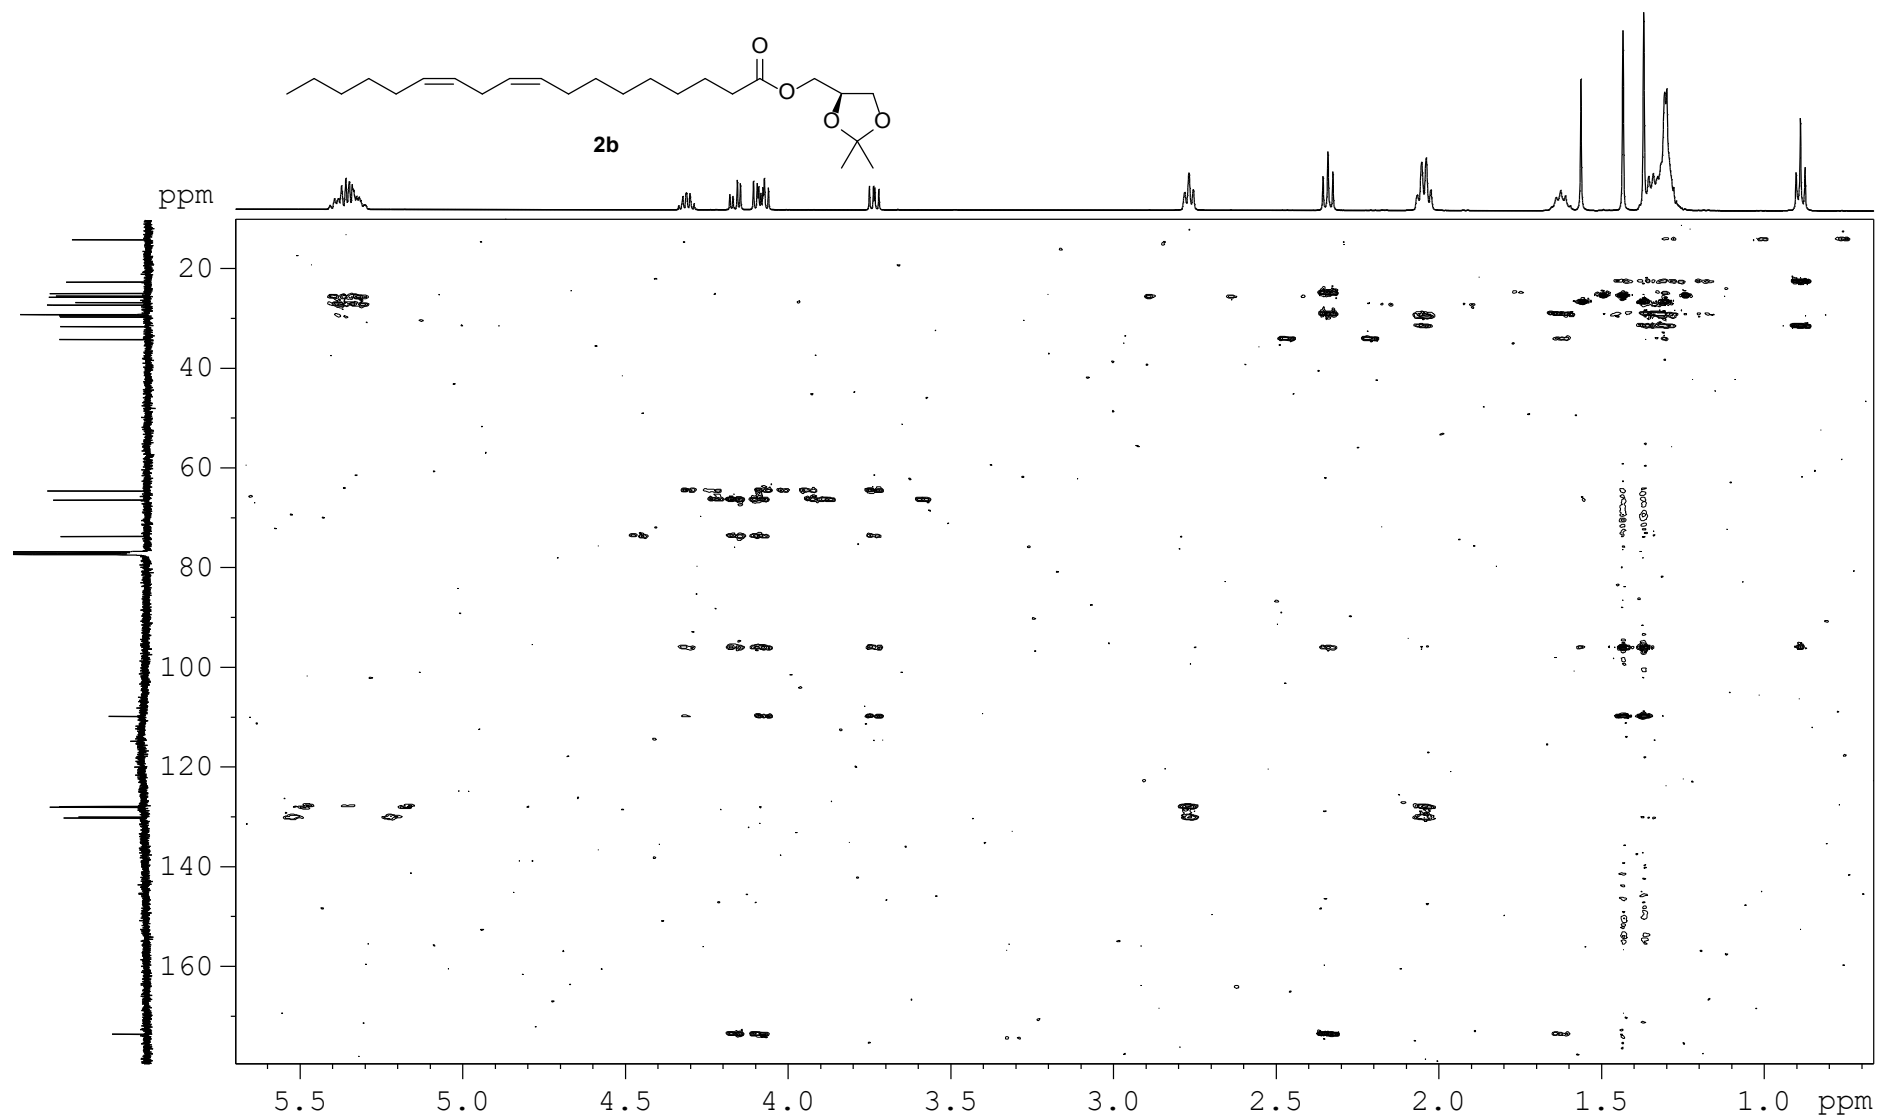

HMBC spectrum of 3-linoleoyl-1,2-*O*-isopropylidene-*sn*-glycerol (**2b**) (500 MHz,  $\text{CDCl}_3$ )



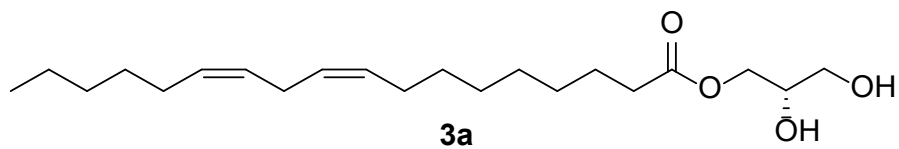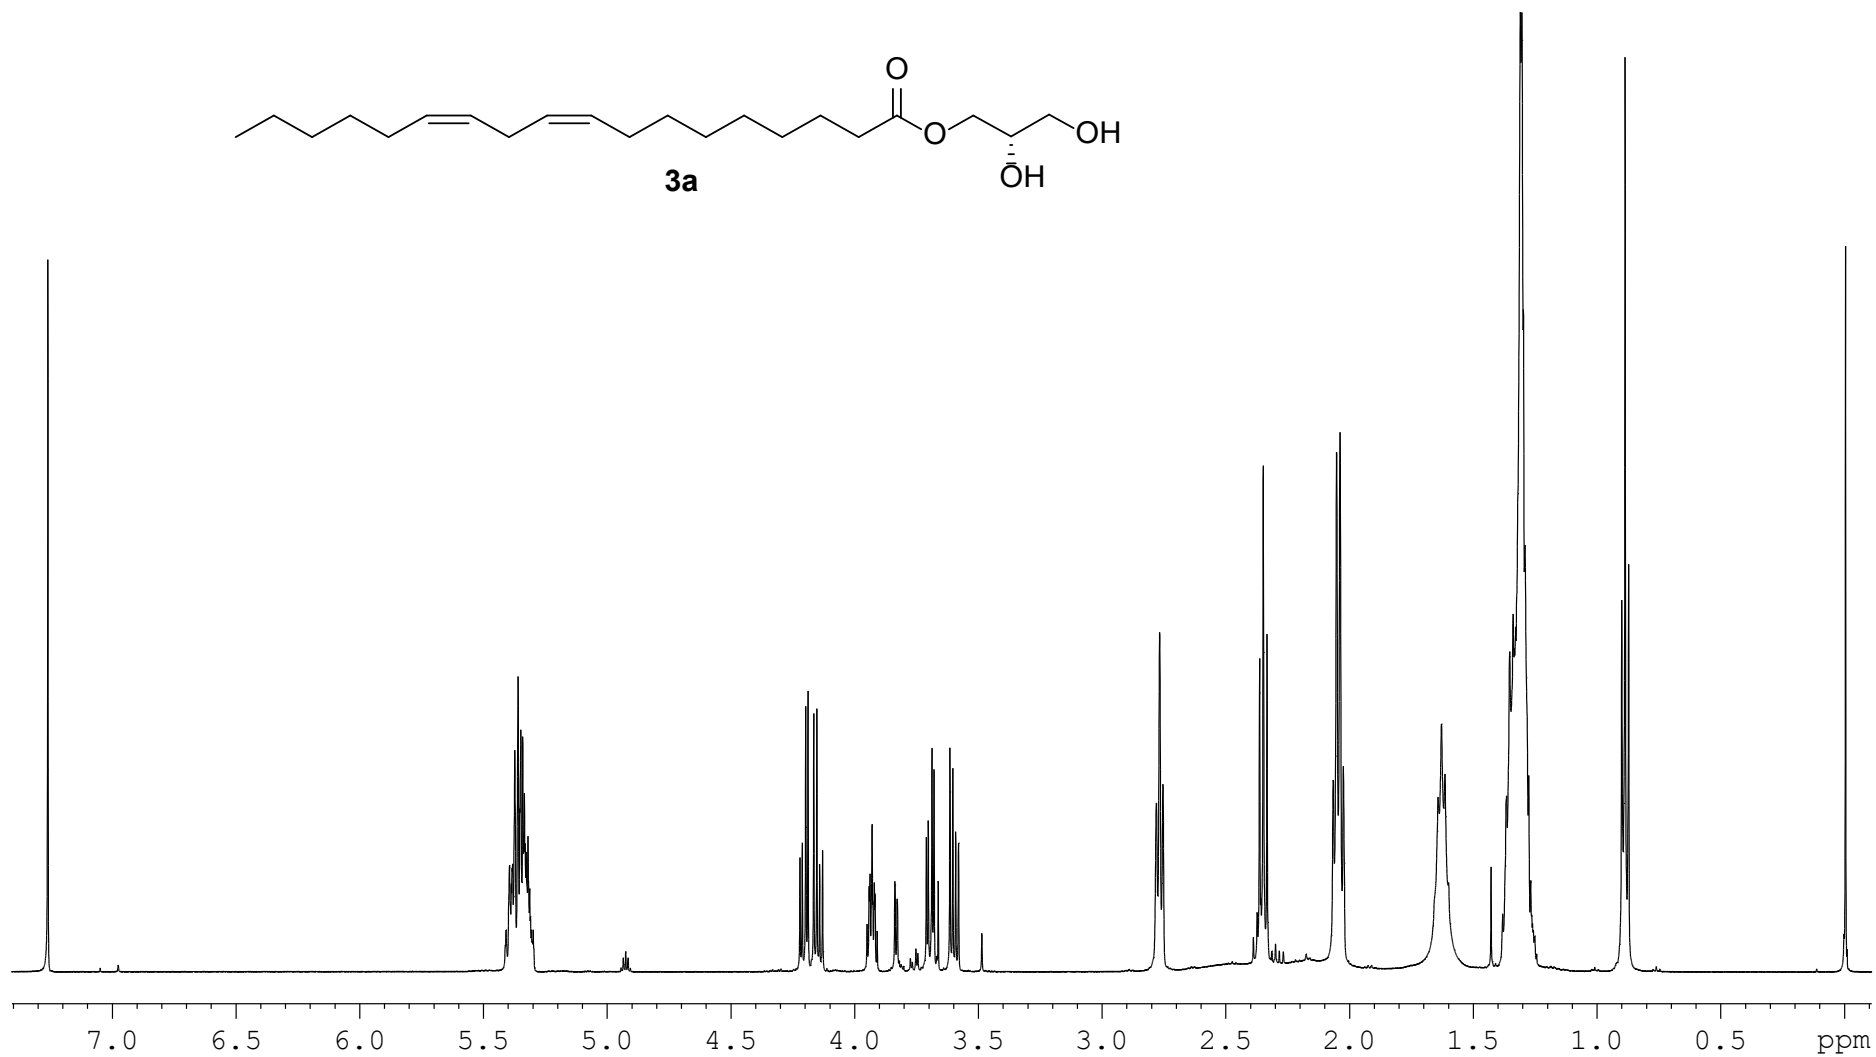

<sup>1</sup>H NMR spectrum of 1-linoleoyl-*sn*-glycerol (**3a**) (500 MHz, CDCl<sub>3</sub>)

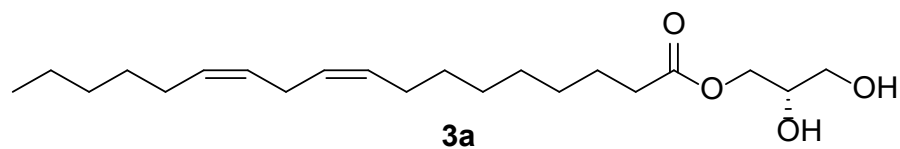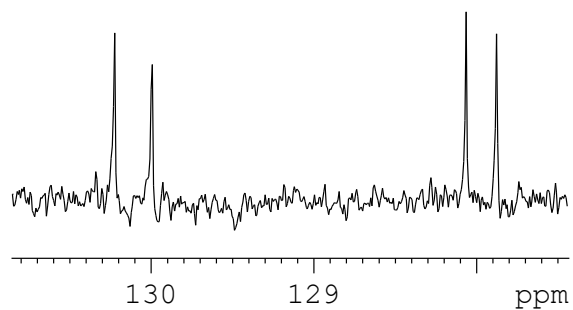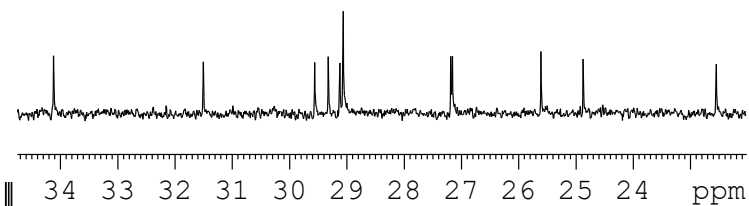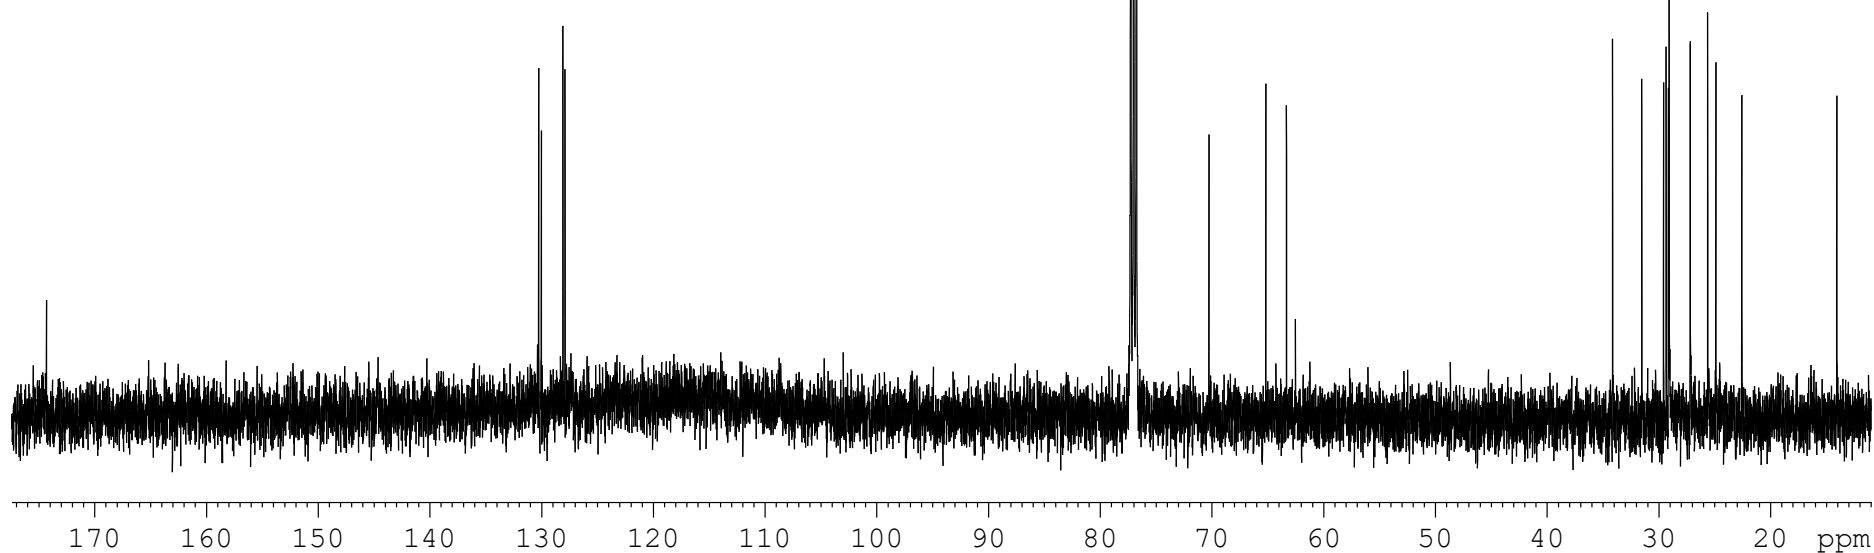

$^{13}\text{C}$  NMR spectrum of 1-linoleoyl-*sn*-glycerol (**3a**) (500 MHz,  $\text{CDCl}_3$ )

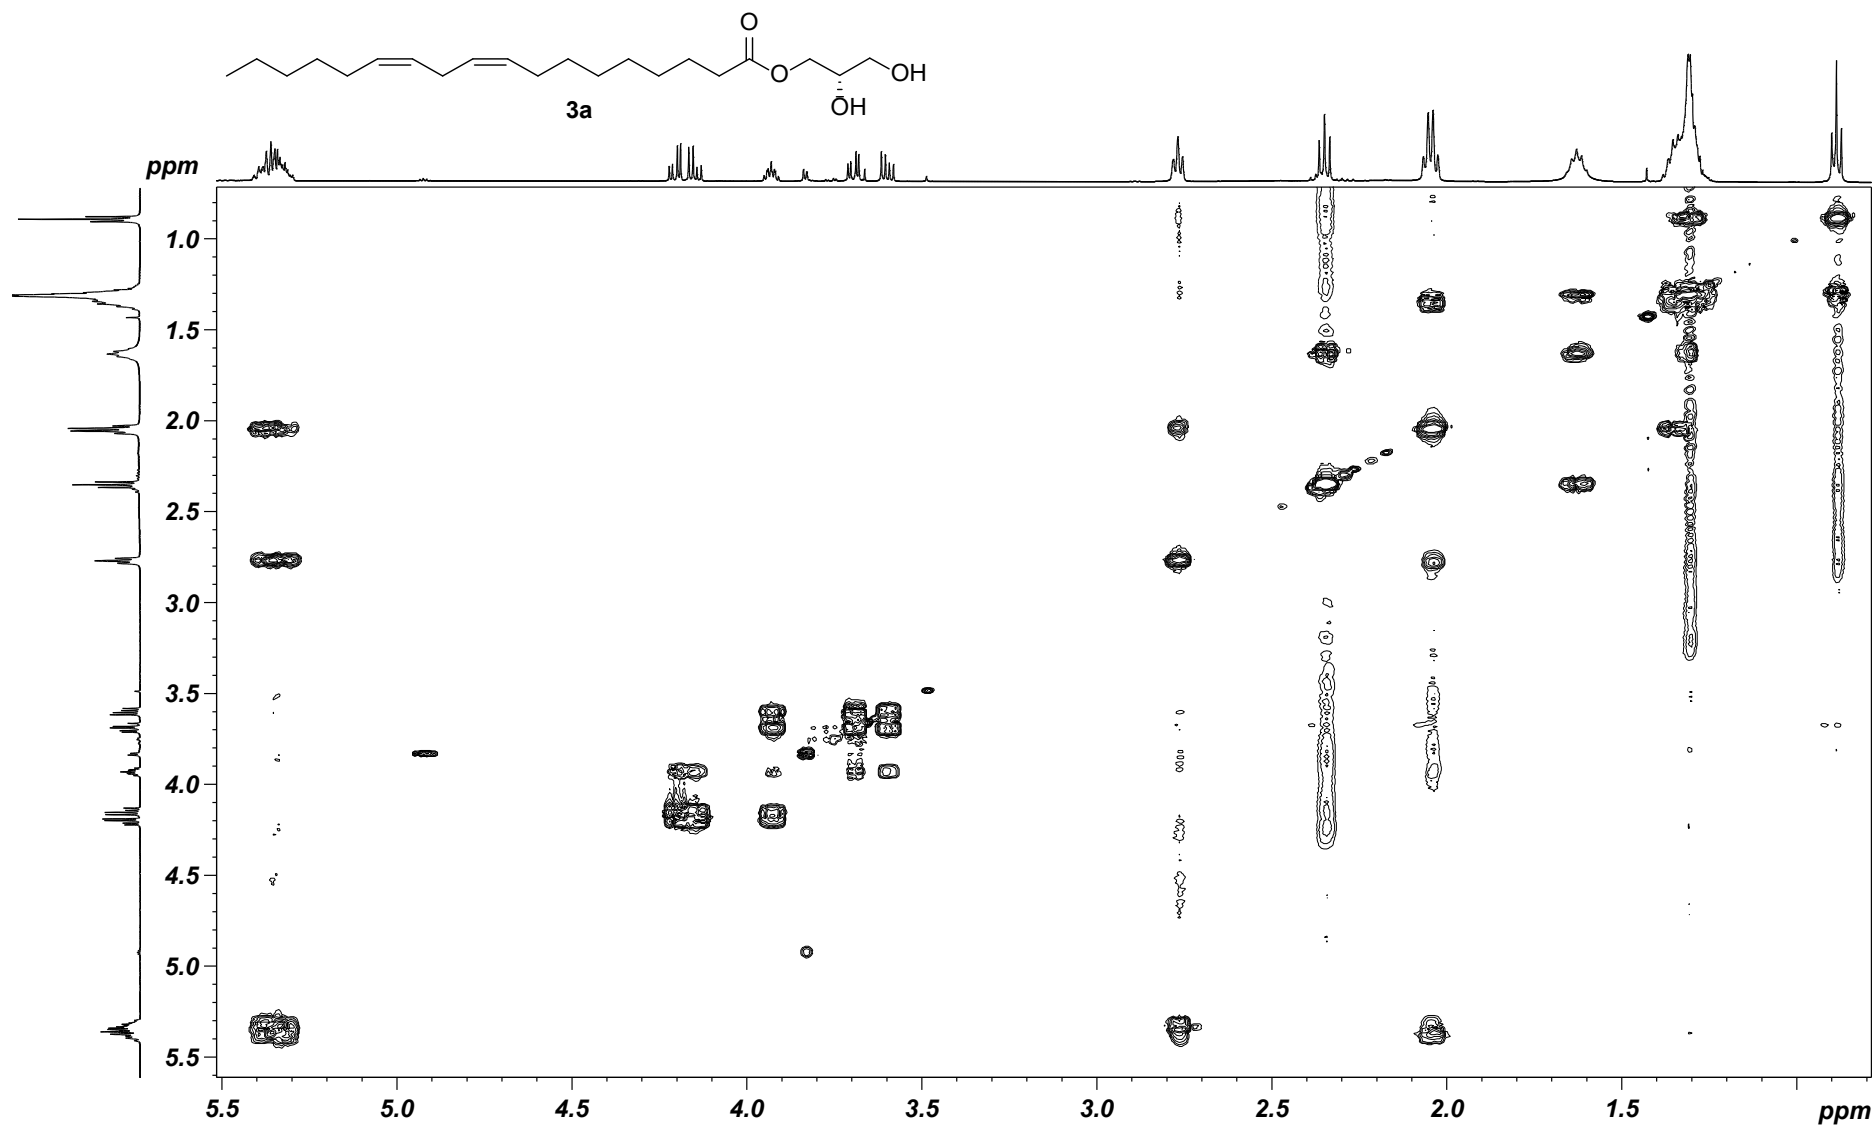

COSY45 spectrum of 1-linoleoyl-*sn*-glycerol (**3a**) (500 MHz, CDCl<sub>3</sub>)

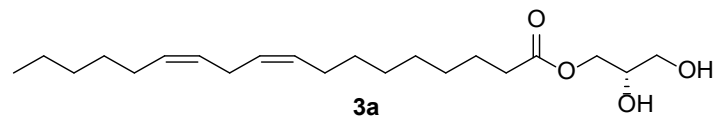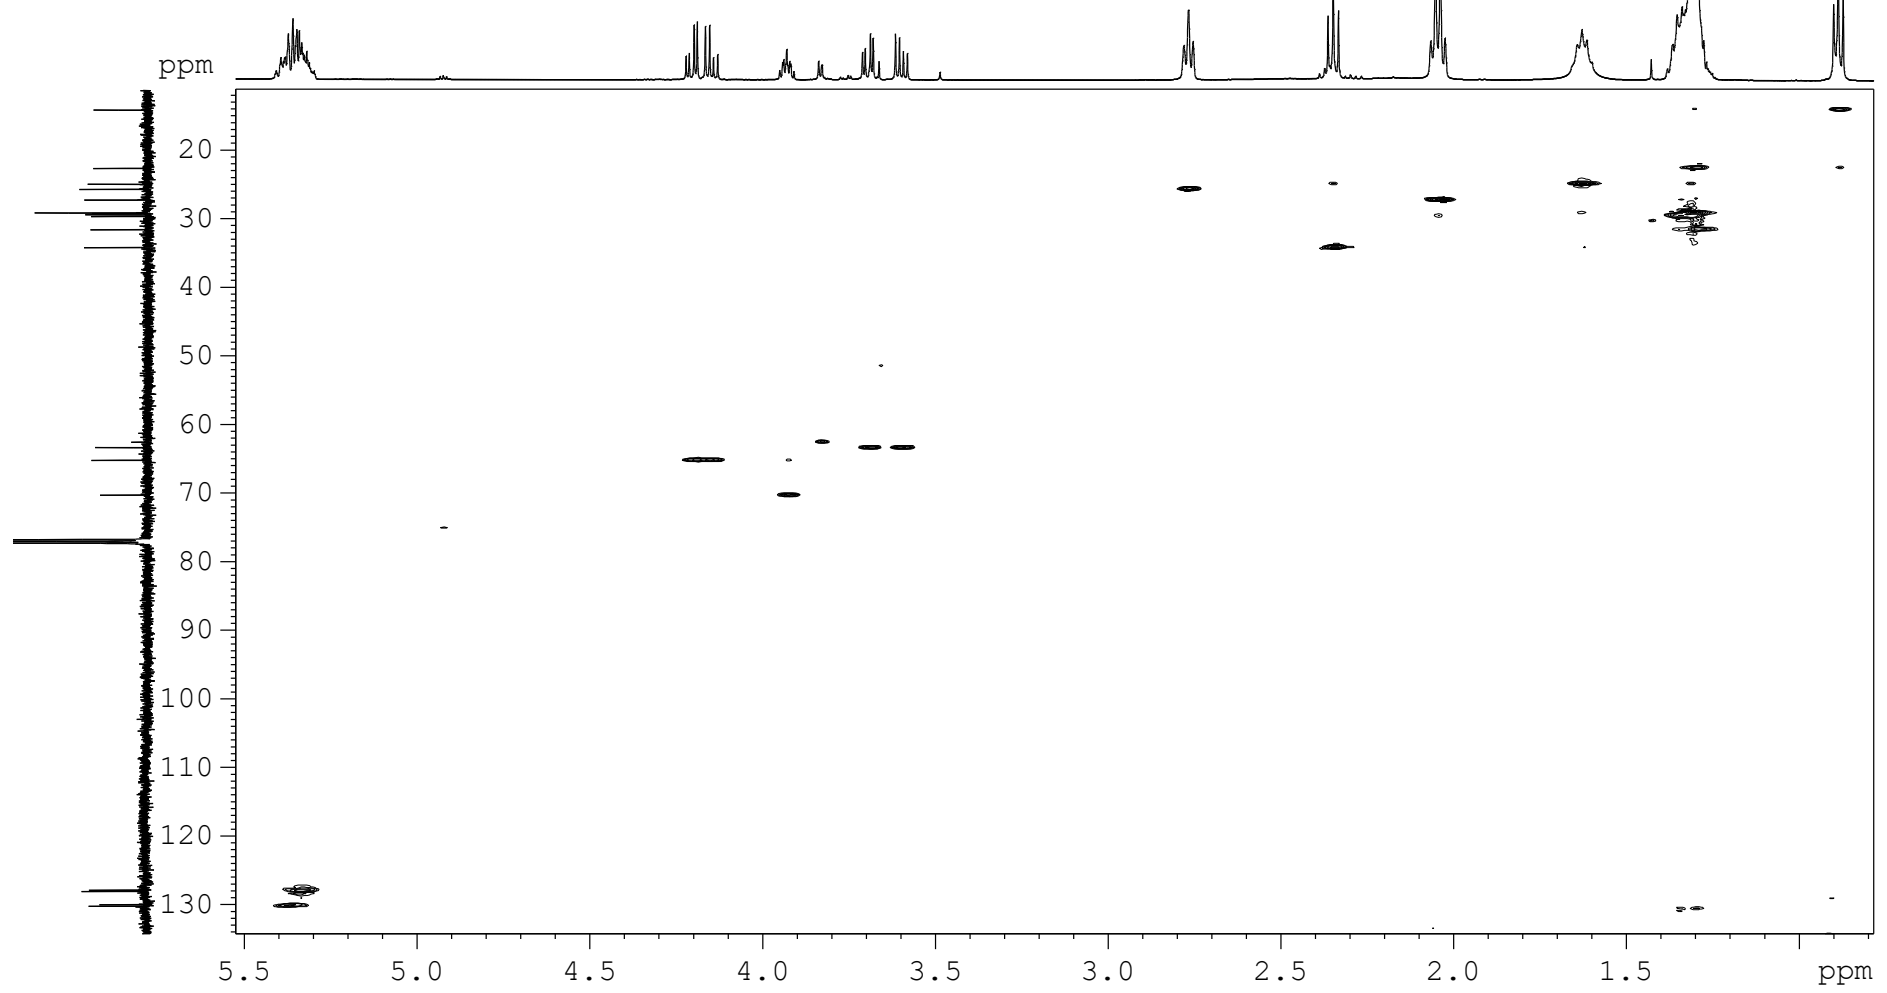

HSQC spectrum of 1-linoleoyl-*sn*-glycerol (**3a**) (500 MHz, CDCl<sub>3</sub>)

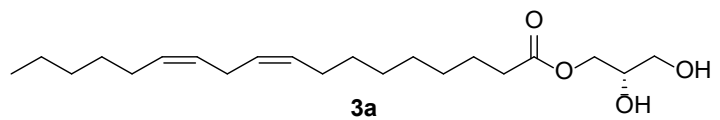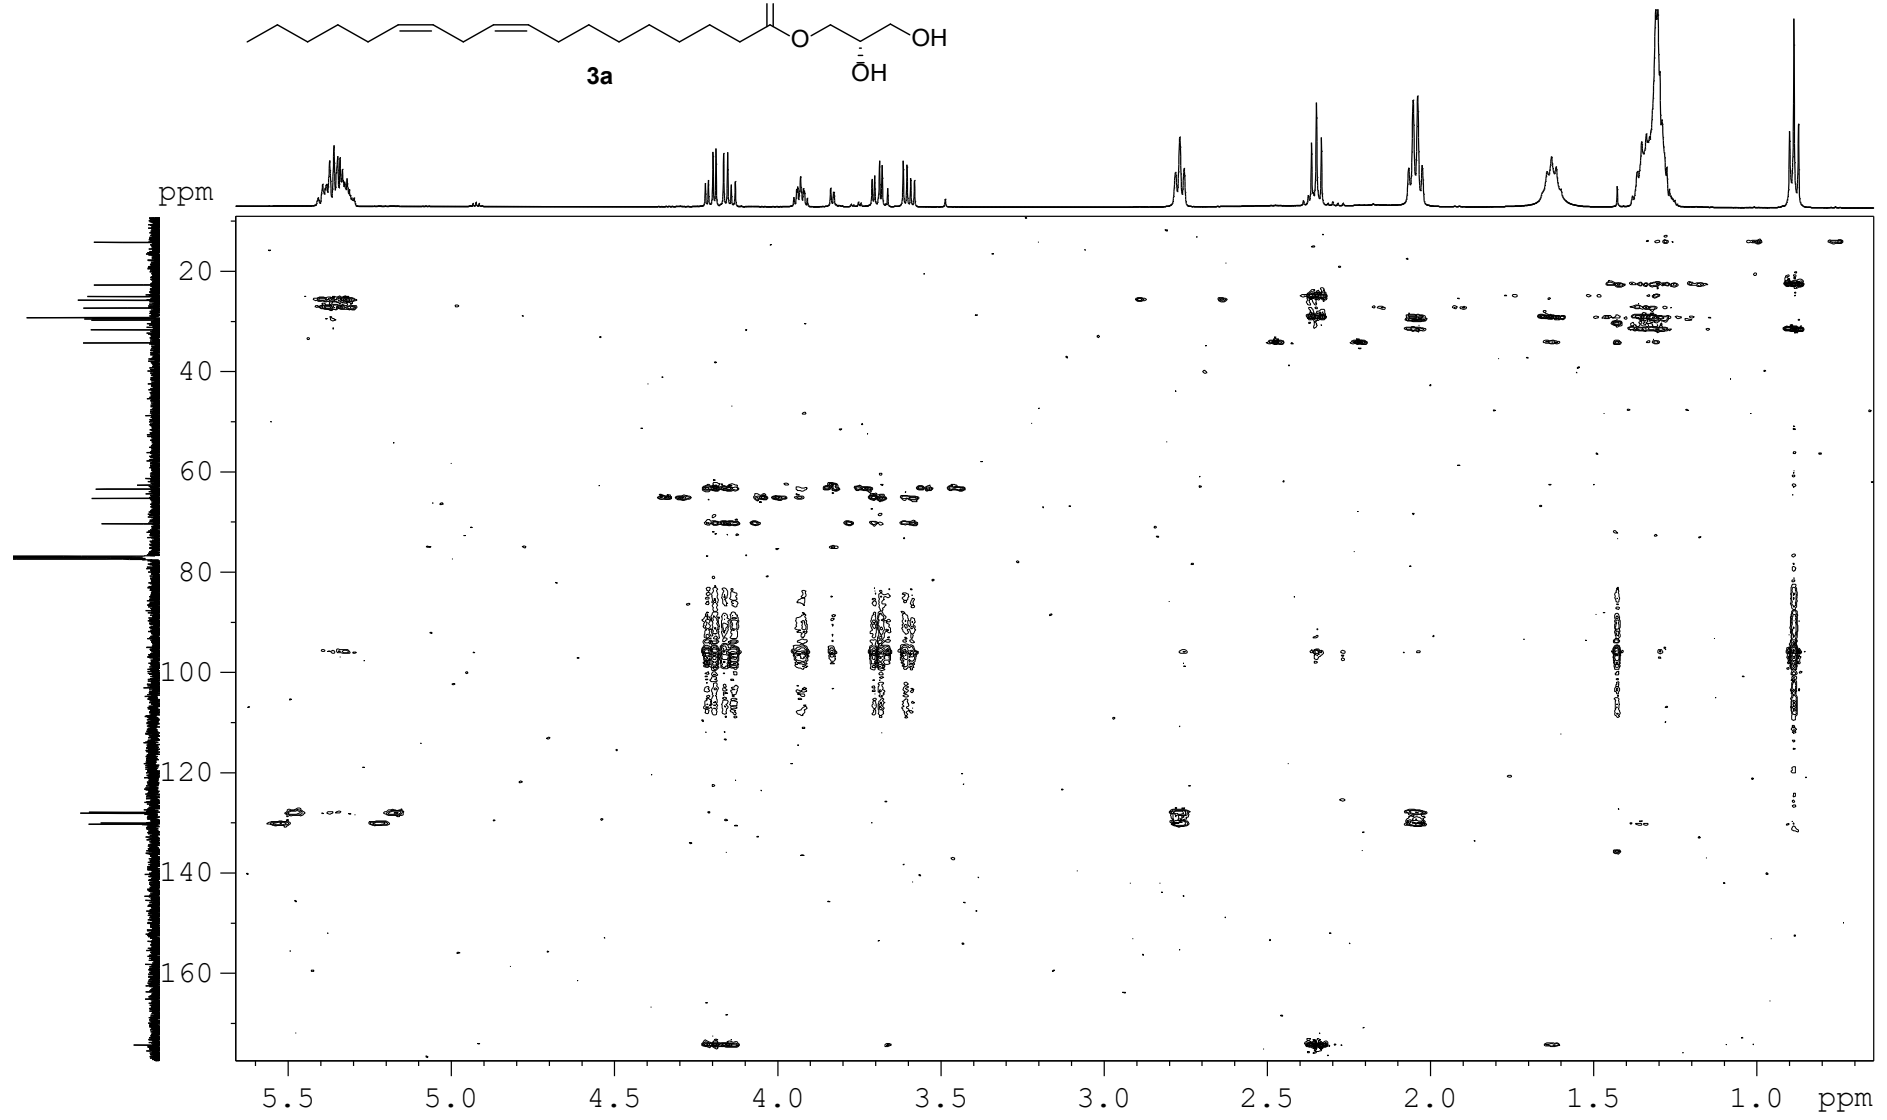

HMBC spectrum of 1-linoleoyl-*sn*-glycerol (**3a**) (500 MHz, CDCl<sub>3</sub>)
